# Supplementary material for: Natural hazard impacts on transport infrastructure in Russia
Source: Copernicus journal article supplement (doi:10.5194/nhess-2019-426), 2020-01-23
Supplement: Supplementary file [file nhess-2019-426-AC2-supplement.pdf]

1 I thank Referee#2 for his/her very useful comments. They allowed improving the manuscript. The  
2 reviewer's comments were taken into account in the revised version of the manuscript, as explained  
3 below. The reviewer's comments are in italics, the answers are in black and the changes made to the text  
4 are in red. The lines numbers refer to the lines numbers of the revised manuscript.

5 *General comments: The author presents the impact of natural hazards on various types of transportation*  
6 *networks in the Russian Federation, based on a database containing the important accidents which*  
7 *occurred in the recent years. Besides providing potentially useful statistics (although the database is not*  
8 *publicly available), the author does not make a comprehensive analysis to really evaluate the causes of*  
9 *risks and the correlation between a specific type of hazard, its potential manifestation in time and the*  
10 *direct and indirect vulnerability of the infrastructure, nevertheless providing a risk of transport accidents*  
11 *and disruptions map which in my opinion induces in error. Therefore, I do not recommend the*  
12 *publication of this article in this general form, without major modifications. Specific comments I attach a*  
13 *pdf with my specific comments, hoping that they will help to author to redefine the paper.*

14 The manuscript was revised. All changes made to the text are described in detail below.

#### 15 **Answers to Reviewer#2 specific comments**

16 *Line 2 - railway – This word is doubled; bus stations are not necessary relevant – the enumeration can be*  
17 *simplified.*

18 The enumeration was revised; the doubled word was deleted:

19 “According to the Federal Law "On Transport Security" (2019), transport infrastructure of the Russian  
20 Federation (RF) is considered as a large and complex technological system including ~~railway and bus~~  
21 ~~stations~~; tunnels, overpasses, and bridges; ~~marine terminals and stations~~; river and sea ports; ~~ports on~~  
22 ~~inland waterways~~; airports; ~~sections of~~ roads, railways, and ~~inland~~ waterways, as well as other buildings,  
23 structures, ~~devices~~, and equipment ensuring the functioning of the transport system.” (Lines 350-354)

24 *Lines 23 – 26 – It's not good to repeat the exact same in the previously mentioned abstract.*

25 The abstract was revised; sentences that repeated the main text of the manuscript were deleted.

26 *Line 30 – almost all of the listed facilities - maybe it sounds a bit exaggerated?*

27 I agree with this comment. The paragraph was revised as follows:

28 “~~Throughout the area of Russia, almost all of the listed facilities of~~ Due to the large length of the  
29 ~~transportation network, as well as climatic, geological, geomorphologic, and other natural features of the~~  
30 ~~country,~~ transport infrastructure facilities of Russia are exposed to the undesirable impacts of adverse  
31 natural processes and phenomena, as well as natural hazards of various genesis, such as geophysical,  
32 hydro-meteorological, and others (Geography..., 2004). Their distribution through the country area is  
33 discussed below in section 2.1.” (Lines 358-363)

34 *Line 32 – reference not according to journal specifications*

35 The citation of this reference was revised as follows: (Malkhazova and Chalov, 2004). The names of the  
36 editors were used instead of the title of the book.

37 *Lines 33 – 34 – Once again, the abstract text is reused – not a good practice in my opinion.*

38 The abstract was revised; repeating text was deleted.

39 *Line 55 – The author should be mentioned.*

40 The author of the Transport Strategy is the Ministry of Transport of the Russian Federation. The citation  
41 was modified accordingly.

42 *Line 67 – If you are talking about the impact of natural hazards, there are numerous statistics (especially*  
43 *in developed countries) providing the causes of accidents – please search for them.*

44 I agree with the reviewer. The literature review was revised; the changes made are below:

45 “All the authors agree that the adverse weather is a major factor affecting road situation (e.g. Edwards  
46 1996; Rakha et al 2007; Andrey 2010; Andersson and Chapman 2011; Bergel-Hayat et al 2013;  
47 Chakrabarty and Gupta 2013). Many authors connect the maximum number of road accidents with  
48 precipitations (Jaroszweski and McNamara 2014; Spasova and Dimitrov 2015). Aron et al (2007)  
49 revealed that 14% of all injury accidents in Normandy (France) took place during rainy weather and 1%  
50 during fog, frost or snow / hail. Satterthwaite (1976) found the rainy weather to be a major factor  
51 affecting accident numbers on the State Highways of California: on very wet days the number of  
52 accidents was often double comparing to dry days. Brodsky & Hakkert (1988) with data from Israel and  
53 the USA did indicate that the added risk of an injury accident in rainy conditions can be two to three  
54 times greater than in dry weather. And when a rain follows a dry spell – the hazard could be even greater.  
55 Among other weather factors, bright sunlight was identified as a cause of accidents (Shiryaeva 2016).  
56 Redelmeier and Raza (2017) investigated visual illusions created by bright sunlight that lead to driver  
57 error, including fallible distance judgment from aerial perspective. According to their results, the risk of a  
58 life-threatening crash was 16% higher during bright sunlight than normal weather.

59 Some authors consider other natural hazards, such as landslides (Bíl et al., 2014; Schlögl et al., 2019),  
60 flash floods (Shabou et al., 2017) or rock falls (Bunce et al., 1997; Budetta and Nappi, 2013). ~~However,~~  
61 ~~no integrated review of all kinds of natural hazards exists.~~

62 As for railway transport, most of papers also focus on specific hazards, considering impacts of adverse  
63 weather and hydro-meteorological extremes (Ludvigsen and Klæboe, 2014; Nogal et al., 2016),  
64 landsliding (Jaiswal et al., 2011), flooding (Hong et al., 2015; Kellermann et al., 2016), snowfall  
65 (Ludvigsen and Klæboe, 2014) or tree falls (Nyberg and Johansson, 2013; Bil et al., 2017) **as triggers of**  
66 **accidents.**

67 Some studies combine all types of natural hazards affecting road and rail infrastructure (Govorushko  
68 2012; Petrova, 2015; Kaundinya et al., 2016). Voumard et al. (2018) examine small events like earth  
69 flow, debris flow, rockfall, flood, snow avalanche, and others, **which represent three-quarters of the total**  
70 **direct costs of all natural hazard impacts on Swiss roads and railways. None of the studies provides a**  
71 **comprehensive analysis of the harmful influence of natural events.**

72 Investigations of natural hazard impacts on other transport systems than roads and railways are not so  
73 numerous. As example, studies about danger of volcanic eruptions to the aviation should be mentioned  
74 (Neal et al, 2009; Brenot et al., 2014; Girina et al., 2019). **Large explosive eruptions of volcanoes can**  
75 **eject several cubic kilometers of volcanic ash and aerosol into the atmosphere and stratosphere during a**  
76 **few hours or days posing a threat to modern airliners (Gordeev and Girina, 2014).” - (Lines 407-439)**  
77

78 *Line 86 – There are also more recent studies available, such as Donald A. Redelmeier, Shehariat Raza*  
79 *(2017) or Jonathan J. Rolison et al. (2018)*

80 I thank the reviewer for pointing me to these very interesting studies. The studies by Donald A.  
81 Redelmeier, Shehariat Raza (2017) and Jonathan J. Rolison et al. (2018) do not investigate impacts of  
82 solar activity on drivers, which are discussed in the manuscript. Donald A. Redelmeier and Shehariat  
83 Raza (2017) investigate visual illusions created by bright sunlight that lead to driver error. This is another  
84 one aspect. Nevertheless, this reference was included into the literature review. Jonathan J. Rolison et al.  
85 (2018) study differences between real factors that contribute to road accidents and factors reported by  
86 police officers in accident report forms. They do not take into account impacts of solar activity on drivers  
87 among of contributing factors.

88 *Line 118 – Does large economic damage have a qualitative definition?*

89 Yes, it has a qualitative definition. The sentence was replaced by the following paragraphs, which include  
90 damage information for each mode of transport: “The criteria for statistical accounting and reporting  
91 transport accident information by the EMERCOM of Russia are as follow:

92 1) for road accidents:

- 93 • Any fact of an accident during the transportation of dangerous goods;
- 94 • Damage to 10 or more motor units;
- 95 • Traffic interruptions for 12 hours due to an accident;
- 96 • Severe accidents with the death of five or more people or injured 10 or more people.

97 2) for railway accidents:

- 98 • Any fact of the train crash;
- 99 • Damage to wagons carrying dangerous goods, causing people to be injured;
- 100 • Traffic interruptions: on the main railway tracks – for 6 hours or more; in the subway –  
101 for 30 minutes and more;

102 3) for air transport accidents – any fact of the aircraft fall or destruction;

103 4) for water transport accidents:

- 104 • Emergency release of oil and oil products into water bodies in the amount of 1 ton or  
105 more;
- 106 • Accidental ingress of liquid and loose toxic substances into water bodies exceeding the  
107 maximum permissible concentration by 5 or more times;
- 108 • Any fact of flooding or throwing of ships ashore as a result of a storm (hurricane,  
109 tsunami), landing of ships aground;
- 110 • Accidents on small vessels with the death of five or more people or injured 10 or more  
111 people;
- 112 • Accidents on small vessels carrying dangerous goods.” - (Lines 556-578)

113

114 *Line 120 – In which statistics? Please explain a bit better the difference the data base provides compared*  
115 *to EMERCOM data which I believe is considered also in the statistics.*

116 The sentence was replaced by the following paragraphs explaining database features:

117 “The format of the database makes it possible to structure the collected information and classify it  
118 according to the author’s assessment.” - (Lines 527-528)

119 “The accumulation of all the information in the form of an electronic database allows conducting various  
120 thematic search queries and analyzing their results depending on the goals and objectives of the research.”  
121 - (Lines 581-582)

122 *Line 146 – Road transport is probably a more comprehensive analysis category.*

123 I agree with this comment. The word “automobile” was replaced by “road”.

124 *Line 178 – is it correlated the triggering impact of earthquakes on other natural hazards?*

125 The following explanation was added to section 3.1:

126 “Some natural hazards trigger hazards of other types, e.g. earthquake or volcanic eruption can provoke  
127 such slope processes as rock falls, ice collapses, landslides, debris flows / lahars, snow avalanches, and  
128 others; heavy rain can cause debris flows, landslides or floods, etc. Gill and Malamud (2016) examine  
129 hazard interrelationships in more detail. These triggering impacts are also recorded in the database and  
130 taken into account in the analysis.” - (Lines 643-647)

131 *Line 226 – Risk should be correlated also with the length of roads in a specific territory, traffic values*  
132 *and moment of day for the occurrence of natural hazards. Without a form of normalisation, it is just*  
133 *statistics and not risk analysis.*

134 Factors affecting risk of accidents in each type of transport are discussed in the revised version of the  
135 manuscript in sections 3.2.1-3.2.4. The changes made to the text are marked in red in the manuscript.  
136 Definition of risk and a detailed description of the method used were included in the methodology  
137 section:

138 "Risk is understood as the possibility of undesirable consequences of any action or course of events  
139 (Miagkov, 1995). Risk is measured by the probability of such consequences or the probable magnitude of  
140 losses. There are various methods for assessing risk. In the field of natural hazards, risk is generally  
141 defined as by the product of hazard and vulnerability, i.e. a combination of the damageable phenomenon  
142 and its consequences (Eckert et al., 2012). The most researchers calculate risk (R) as a function of hazard  
143 (H), exposure (E) and vulnerability (V):  $R=f(H,E,V)$  (e.g. Arrighi et al., 2013; Falter et al., 2015; IPCC,  
144 2012; Schneiderbauer and Ehrlich, 2004). Various authors propose their own techniques of calculating  
145 risk, mainly within the framework of this common approach. In a recent publication, Arosio et al. (2020)  
146 propose a holistic approach to analyze risk in complex systems based on the construction and study of a  
147 graph modeling connections between elements.

148 Another one approach to measuring risk suggests using the concept of emergency situation. In Russia, an  
149 emergency situation is defined as a disturbance of the current activity of a populated region due to abrupt  
150 technological / natural impacts (catastrophes or accidents) resulting in social, economic, and / or  
151 ecological damage, which requires special management efforts to eliminate it (Petrova, 2005). An  
152 emergency situation caused by the impact of natural hazards on technological systems and infrastructure  
153 can be considered as a result of all the factors of risk: hazard, exposure and vulnerability; it combines  
154 hazard defined in its physical parameters, exposure of a population or facilities located in a hazard area  
155 and subject to potential losses, and vulnerability that links the intensity of a hazard to undesirable  
156 consequences. An emergency resulting from a hazardous impact may be a measure of the losses due to  
157 this impact. The total frequency of emergencies of varying severity may serve as a comprehensive  
158 indicator of risk assessment (Shnyparkov, 2004).

159 ~~Occurrence frequencies~~ In this study, the above approach using frequency of emergency situations as a  
160 measure of risk was applied. As an indicator of risk, the average frequency of occurrence of transport  
161 accidents and traffic disruptions triggered by natural impacts, which led to emergency situations of  
162 different scale and severity, was ~~for the six-year period from 2013 to 2018 were used as risk indicators.~~  
163 ~~For this purpose, the~~ Risk indicators were calculated for each federal region as average annual numbers of  
164 ~~accidents emergency situations in was calculated for each federal region and~~ each type of transport, as  
165 well as a resulting average annual number of emergencies due to all transport accidents and disruptions.  
166 Thus, the calculated indicators included the probability of undesirable consequences (emergencies) due to  
167 impacts of natural hazards on transport infrastructure exposed and vulnerable to these influences.  
168 Quantitative and qualitative criteria for classifying transport accidents and disruptions as emergency  
169 situations are listed above. For the analysis, the period from 1992 to 2018 was chosen, since it covered the  
170 information accumulated in the database.

171 Additionally, all the federal regions were divided into groups ~~by~~ according to their ~~levels of~~ risk level.  
172 The risk level was estimated for each federal region and each type of transport by the average annual  
173 number of emergency situations in comparison with the average value of the indicator in Russia. The  
174 number of groups was determined in each case depending on the dispersion of the calculated value." -  
175 (Lines 596-632)

176 *Line 255 – The database shows for the short period between 2013 and 2018 accidents due to natural*  
177 *hazards, but hazards have long or short return periods; not considering this aspect, as well as*  
178 *vulnerability and exposure means that you are providing a map reflecting the risk, but a map showing*  
179 *recently affected areas. What if a major earthquake in a not so active area strikes an area with no*  
180 *transport accidents in the last 10 years? Your map will tell that the risk in that area is small, not really*  
181 *helping in mitigation efforts.*

182 The database covers the period from 1992 to 2018. This period is used in the revised version of the  
183 analysis for all modes of transport (not only for railway as previously). During this period, events caused  
184 by hydro-meteorological and exogenous natural hazards are mainly recorded in the database.  
185 Nevertheless, the most seismically active regions of Russia have the highest risk indicator as a result of  
186 the assessment. The following explanation was added to the Conclusion section:

187 "For the study period of 1992 to 2018, the database mainly recorded events caused by exposure to hydro-  
188 meteorological and exogenous natural hazards. With high value of the risk index, Kamchatka, Sakhalin,  
189 the North Caucasus, and south of Siberia are also among the most seismically active regions of Russia,  
190 which further increases the likelihood of emergencies in these regions in case of an earthquake." - (Lines  
191 934-937)

192 *Line 263 – How is vulnerability considered?*

193 The vulnerability is considered in the concept of emergency situation, which is used in this study to assess  
194 risk. Definition of risk and a detailed description of the method used are included in the methodology  
195 section (see response to the comment to line 226). The following explanation was also added to the  
196 Conclusion section:

197 "An annual average frequency of occurrences of emergency situations of various scale and severity  
198 ~~severe events was is applied chosen~~ in this study among all possible methods for assessing risk. Unlike  
199 methods that assess risk by measuring its components such as hazard, exposure and vulnerability, this  
200 approach takes into account the consequences of the above factors and the probability of these  
201 consequences. Transport accidents and disruptions are considered in this case as consequences of natural  
202 hazard impacts on transport infrastructure that is exposed and vulnerable to these impacts. The risk index  
203 is calculated as an annual average number of emergency situations caused by natural hazard impacts in  
204 each federal region and each type of transport." - (Lines 912-919)

205 *Line 266 – Does this correlate with natural hazard maps?*

206 This does not fully correlate with natural hazard maps. A description of natural hazards in Russia was  
207 included in section 2.1:

208 "The size and geographical location of the Russian Federation in various climate and geological  
209 conditions determine a great variety of dangerous natural processes and phenomena in its area, including  
210 endogenous, exogenous and hydro-meteorological hazards. The most characteristic features of the  
211 geography of natural hazards in Russia are as follow:

- 212 • Natural hazards associated with cold and snow winters are common throughout the country;
- 213 • The population and the economy are relatively low exposed to the most destructive types of  
214 natural hazards (earthquakes, tsunamis, hurricanes, etc.), and therefore the frequency of  
215 occurrence of natural emergencies with severe consequences is low;
- 216 • The historically formed strip of the main settlements from the European part of Russia through  
217 the south of Siberia to the Far East approximately coincides with the zone of the smallest  
218 manifestation of natural hazards (Miagkov, 1995).

219 In Russia, there are several hundred volcanoes, 78 of which are active. Kamchatka and the Kuril Islands  
220 are most at risk of volcanic eruptions; explosive eruptions of two to eight volcanoes are observed  
221 annually (Girina et al., 2019). About 20% of the country area with a population of 20 million people is  
222 exposed to earthquakes. The most seismically active regions are Kamchatka, Sakhalin, as well as the  
223 south of Siberia and the North Caucasus.

224 Almost the entire territory of Russia is exposed to dangerous exogenous processes; their intensity  
225 increases from north to south and from west to east (EMERCOM, 2010). Among exogenous processes,  
226 landslides, which are active in 40% of the country area, debris flows (in 20%), snow avalanches (in more  
227 than 18% of the area), and other slope processes have the greatest intensity and negative impact on the  
228 transport infrastructure. The highest avalanche and debris flow activity is observed in the North Caucasus

229 (Dagestan, North Ossetia-Alania, Kabardino-Balkaria Republics) and in Sakhalin. The greatest intensity  
230 of landslides is in the North Caucasus (Stavropol and Krasnodar Territories, Rostov Region, Dagestan,  
231 Karachaevo-Cherkessia, Ingushetia, North Ossetia-Alania, Kabardino-Balkaria, and Chechen Republics),  
232 Ural (Chelyabinsk and Sverdlovsk Regions), as well as Irkutsk, Sakhalin, and Amur Regions, Primorsky  
233 and Khabarovsk Territories.

234 Hydro-meteorological hazardous processes and phenomena such as strong winds, squalls, catastrophic  
235 showers, floods, snowstorms, thunderstorms, hailstorms, etc. are widespread in the country. One of the  
236 most dangerous climate situations is the combination of heavy precipitation and strong wind in the coastal  
237 regions of the Far East (Kamchatka, Khabarovsk, and Primorsky Territories, and Sakhalin Region). The  
238 highest frequency of strong winds is observed in the south and in the middle part of the European Russia,  
239 as well as in the Far East. The most intense rains take place in Kamchatka, Krasnodar and Primorsky  
240 Territories; the heaviest snowfalls happen in regions of the North Caucasus, north and south-west of  
241 Siberia, as well as Far East (Sakhalin and Magadan Regions, Kamchatka, Khabarovsk and Primorsky  
242 Territories, Chukotka). Regions of the Far East, such as Republic of Sakha-Yakutia, Primorsky and  
243 Khabarovsk Territories, Amur Region, as well as south of the European Russia (Krasnodar and Stavropol  
244 Territories, Republics of the North Caucasus) are mostly exposed to catastrophic floods.

245 For Russia as a whole, the cumulative degree of natural hazard is increasing from west to east and south,  
246 with progress to the mountainous regions. The most dangerous areas in terms of natural hazards  
247 manifestation are situated in the Territories and Republics of the North Caucasus, Altai Mountains,  
248 Irkutsk Region and Transbaikalia, the Pacific coast of the Far East (Magadan Region and Khabarovsk  
249 Territory), and especially Sakhalin, the Kuril Islands and Kamchatka (Malkhazova and Chalov, 2004).

250 According to the assessment by EMERCOM (2010), the most vulnerable to the impacts of natural  
251 hazards are the following federal regions: Republics of Sakha-Yakutia, Komi and Karelia, Khabarovsk  
252 and Primorsky Territories, Amur, Arkhangelsk, Irkutsk, Magadan, Murmansk, and Volgograd Regions, as  
253 well as Evreiskaia (Yevish) AO, Khanty-Mansiysk and Chukotka Autonomous Okrugs. The vulnerability  
254 was measured as ratio of the total number of realized natural sources of emergencies to the number of  
255 emergency situations caused by them. In the listed regions, the vulnerability is higher than an average for  
256 Russia.” - (Lines 468-516)

257 *Line 274 – As mentioned before, understanding risk with no consideration of hazard, vulnerability or*  
258 *exposure, but just based on a 5-years statistics window, is certainly not the best instrument to target risk*  
259 *mitigation; especially also since accidents variations are not considerable. Also, the size of the territories*  
260 *is very different – how does this reflect in the analysis?*

261 Definition of risk and a detailed description of the method used are included in the methodology section  
262 (see above responses to the comments to line 226 and 263).

263 *Line 279 – Not well referenced.*

264 The citation of this reference was revised as follows: (Malkhazova and Chalov, 2004). Instead of the title  
265 of the book, the names of the editors were used.

266 *Line 281 – Can you please provide an evidence?*

267 The sentence was modified as follows:

268 “Other factors, such as growing transportation network, increased traffic, and the lack of funding will also  
269 lead to increasing of adverse impacts, especially ~~in-the~~ with further development of transport  
270 infrastructure to areas with high level of natural identified regions most at risk.” (Lines 944-946)

271 *Line 298 – Given the potential usefulness of the mentioned database I think that is a limitation not to*  
272 *share this database with the community, also in the purpose of validation and verification.*

273 The sentence was modified as follows:

274 “The data used in this study are collected by the author in an electronic database, which is not confidential  
275 and property of Lomonosov Moscow State University and cannot be made available publicly”.

276 *Table 1 - Volcanic eruption - Volcanic eruptions can clearly affect air transport (see what happened in  
277 Iceland a couple years ago) and in some cases water transport.*

278 I absolutely agree with the reviewer that volcanic eruptions can affect air transport. Table 1 reflects only  
279 accidents and disruptions that occurred in Russia. However, the volcanic eruption in Iceland really  
280 affected Russian airports. I added these incidents to Table 1. The following explanation was also included  
281 in section 3.1.3:

282 “For the study period, there was not a single accident caused by volcanic eruption in Russia. Due to the  
283 eruption of the Icelandic volcano Eyyafyatlayokudl, airlines canceled and delayed more than 500 flights  
284 at 10 Russian airports in April 2010; 32 thousand passengers could not fly.” - (Lines 775-777)

285 *Snow avalanche – Only if the airport is close to the avalanche area probably; in this situation, also water  
286 transport could be blocked by rock fall.*

287 As is indicated in the heading: “Transport accidents and traffic disruptions caused by natural hazards in  
288 Russia (1992-2018)”, Table 1 reflects only real accidents that occurred in Russia. The accident on April  
289 10, 2010 in Kamchatka was recorded in the database when a helicopter was damaged as a result of an  
290 avalanche. The explanation was included in section 3.1.3 (Lines 773-774). No cases were recorded in the  
291 database when water transport was blocked by rock fall.

292 *Figure 2. – It would be interesting to have at least the headers in English, to understand what the  
293 database accounts for.*

294 Figure 2 was replaced by the following description of the database structure in Section 2.2:

295 “The main database table, into which all the information is entered, has the following structure:

- 296 1) event number - the number changes automatically as information is entered;
- 297 2) date of the incident;
- 298 3) country;
- 299 4) region;
- 300 5) location - the distance to the nearest settlement is additionally indicated;
- 301 6) type of accident - according to the EMERCOM classification and assessment by the author;
- 302 7) a brief description of the event, including the time of occurrence, probable cause of the accident,  
303 if available, its consequences, and measures taken to eliminate them;
- 304 8) geographical coordinates, if applicable;
- 305 9) the scale of the emergency situation caused by the accident – local, inter-municipal, regional,  
306 inter-regional, cross-border;
- 307 10) the number of deaths;
- 308 11) the number of injuries;
- 309 12) economic and environmental losses, if any;
- 310 13) source of information.” - (Lines 528-544)

311 *Figure 3. – I would prefer to see the labels (names of regions) in English, in order to identify places  
312 mentioned in the text. This applies to all maps.*

313 A new Figure 2 with names of regions in English was included in the revised version of the manuscript.  
314 All the federal regions, which are mentioned in the manuscript, are indicated in Figure 2.

315 *Figure 3 – How come there are no values between 2.5 and 3.0 or 4.5 and 5?*

316 Figure 3 was revised to reflect the new assessment results.

317 *Figure 5 – How come there are no values between 2.5 and 3.0 or 4.5 and 5?*

318 Figure 5 was revised to reflect the new assessment results.

319 *Do the air and water transportation accidents are included in the risk analysis?*

320 Yes, the air and water transportation accidents are included in the risk analysis. The explanation was  
321 added to section 2.2:

322 “Road, rail, air and water transport were considered in the total risk analysis”. - (Lines 594-595)

323



324

## Natural hazard impacts on transport infrastructure in Russia

325

Elena Petrova

326

Faculty of Geography, Lomonosov Moscow State University, Moscow, Russia (epgeo@mail.ru)

327

328

**Abstract.** ~~Transport infrastructure is considered as a large and complex technological system including railway and bus stations; tunnels, overpasses, and bridges; sea and river ports; airports; roads, railways, and waterways, as well as other structures, buildings and equipment ensuring the functioning of transport. Almost all of the transport infrastructure facilities are exposed to natural hazard impacts of different genesis. Such impacts pose a threat to transport safety and reliability, trigger accidents and failures, cause traffic disruptions and delays in delivery of passengers and goods. Under conditions of climate changes, these harmful impacts with negative consequences will increase.~~ The transport infrastructure of Russia is exposed to multiple impacts of various natural hazards and adverse weather phenomena such as heavy rains and snowfalls, river floods, earthquakes, volcanic eruptions, landslides, debris flows, snow avalanches; rock falls, ~~ice phenomena~~ ~~iceing conditions of roads~~, and others. The paper considers impacts of hazardous natural processes and phenomena on transport within the area of Russia. Using the information of the author's database, contributions of natural factors to road, railway, air, and water transport accidents and failures are assessed. The total risk of transport accidents and traffic disruptions ~~triggered~~ by adverse and hazardous natural impacts, ~~as well as the risk of road and railway accidents and disruptions as the most popular modes of transport~~ is assessed at the level of Russian federal regions. ~~The concept of emergency situation is used to measuring risk. 838 emergency situations of various scale and severity caused by natural hazard impacts on the transport infrastructure over 1992 to 2018 are considered. The average annual number of emergencies is taken as an indicator of risk. Regional differences in the risk of transport accidents and disruptions due to natural events are analyzed. Regions most at risk are identified.~~

348

**Keywords:** Transport infrastructure, natural hazards, transport accident, traffic disruption, database

349

### 1. Introduction

350

~~According to the Federal Law "On Transport Security" (2019), transport infrastructure of the Russian Federation (RF) is considered as a large and complex technological system including~~ ~~railway and bus stations;~~ tunnels, overpasses, and bridges; ~~marine terminals and stations;~~ river and sea ports; ~~ports on inland waterways;~~ airports; ~~sections of~~ roads, railways, and ~~inland~~ waterways, as well as other buildings, structures, ~~devices,~~ and equipment ensuring the functioning of the transport system. ~~The Russian Federation (RF)~~ Russia has a very extensive transportation network that is among the largest in the world. It includes 1.5 million km of public roads, more than 600,000 km of airways, 123,000 km of railway tracks, and 100,000 km of inland navigable waterways (Rosstat, 2018).

358

~~Throughout the area of Russia, almost all of the listed facilities of~~ Due to the large length of the transportation network, as well as climatic, geological, geomorphologic, and other natural features of the country, transport infrastructure ~~facilities of Russia~~ are exposed to the undesirable impacts of adverse natural processes and phenomena, as well as natural hazards of various genesis, such as geophysical, hydro-meteorological, and others (~~Geography...~~, 2004). ~~Their distribution through the country area is discussed below in section 2.1.~~ These impacts may endanger transport safety and reliability, trigger accidents and failures, disrupt the normal operation of transport system, cause delays in delivery of passengers and goods, and lead to other negative consequences.

366

~~All natural hazards can be divided into two groups, based on their origin, features of time variability and spatial distribution, as well as the impact pattern~~ Natural processes and phenomena can be classified in various ways depending on the objectives of a study. Natural hazards can be typify according to their

367

368

369 genetic features, the intensity of their manifestation, the main formation and development factors,  
370 characteristics of spatial distribution and mode, etc. (Malkhazova and Chalov, 2004).

371 Previously, two types of natural hazards were found, based on their genesis, distribution in space and  
372 time, and the impact pattern on the technosphere and society in populated areas (Petrova, 2005). In the  
373 context of the present study, the proposed classification scheme was adapted taking into account impacts  
374 of natural hazards on the transport infrastructure (Figure 1).

375 Solar and geomagnetic disturbances (space weather), geodynamics, geophysical and astrophysical field  
376 variations, and other global processes belong to the first group. They have global scale in space and cyclic  
377 development in time. ~~They~~ Natural processes of this type may influence the transport infrastructure both  
378 directly, causing electronics error and automatic machinery failure, as well as indirectly, by ~~reducing~~  
379 ~~reliability~~ affecting the nervous system of operators, drivers or pilots (~~Petrova, 2005~~) and thereby leading  
380 to a decrease in their reliability. Natural hazards of the second type are of more “earthly” origin, i.e. from  
381 the atmosphere, lithosphere, hydrosphere or biosphere. They vary greatly in their spatial scale and  
382 geographical location. This type of natural hazards includes earthquakes, volcanic eruptions, landslides,  
383 snow avalanches, hurricanes, windstorms, heavy rains, hail, lightning, snow and ice storms, temperature  
384 extremes, wild fires, floods, droughts, etc. Natural hazards belonging to this ~~Geological, hydro-~~  
385 ~~meteorological, biological, and other natural hazards belonging to the second~~ group cause a direct  
386 destructive effect leading to accidents and disruptions.

387 A transport accident is any accident that occurs when people and goods are transported. With over 1.2  
388 million people killed each year, road accidents are among the world's leading causes of death; another  
389 20–50 million people are injured each year on the world's roads (WHO, 2017). Transport accidents of  
390 other types including air, rail, and water transport are not as numerous as road crashes, but the severity of  
391 their consequences is much higher because of the higher number of people killed and injured per accident.  
392 Shipwrecks with a large number of passengers have the highest number of casualties.

393 Traffic interruptions and disruptions cause multiple social problems because our societies are highly  
394 dependent on the transport system for people's daily mobility and for goods transport (Mattsson and  
395 Jenelius, 2015). In the case of emergency situation, transport network serves as a life-line system. Thus,  
396 ensuring the robustness and reliability of the transport system is one of the most important and pressing  
397 problems of the socio-economic development of any country. In May 2018, the Ministry of Transport of  
398 the RF has developed a new version of the Transport Strategy up to 2030 (~~Ministry of Transport of the~~  
399 ~~Russian Federation~~, 2018). Among the key priorities, the Transport Strategy includes requirements to  
400 cope with the modern challenges, such as climate change and a need for increasing the safety of the  
401 transport system.

402 Since the early 1950's (Tanner 1952), it has been recognized that weather conditions affect many road  
403 (un-)safety aspects such as driver's attention and behavior, vehicle's operation, road surface condition, etc.  
404 A large number of studies devoted to the influence of ~~adverse~~ weather ~~conditions~~ factors on the accident  
405 rates were published over the last decades (~~Brodsky and Hakkert 1988; Edwards 1996; Rakha et al 2007;~~  
406 ~~Andrey 2010; Andersson and Chapman 2011; Petrova 2013; Bergel-Hayat et al 2013; Chakrabarty and~~  
407 ~~Gupta 2013; Jaroszweski and McNamara 2014; Spasova and Dimitrov 2015; Shiryaeva 2016~~). All the  
408 authors agree that the ~~adverse~~ weather is a major factor affecting road situation (e.g. Edwards 1996;  
409 Rakha et al 2007; Andrey 2010; Andersson and Chapman 2011; Bergel-Hayat et al 2013; Chakrabarty  
410 and Gupta 2013). Many authors connect the maximum number of road accidents with precipitations  
411 (Jaroszweski and McNamara 2014; Spasova and Dimitrov 2015). Aron et al (2007) revealed that 14% of  
412 all injury accidents in Normandy (France) took place during rainy weather and 1% during fog, frost or  
413 snow / hail. Satterthwaite (1976) found the rainy weather to be a major factor affecting accident numbers  
414 on the State Highways of California: on very wet days the number of accidents was often double

415 comparing to dry days. Brodsky & Hakkert (1988) with data from Israel and the USA did indicate that the  
416 added risk of an injury accident in rainy conditions can be two to three times greater than in dry weather.  
417 And when a rain follows a dry spell – the hazard could be even greater. Among other weather factors,  
418 bright sunlight was identified as a cause of accidents (Shiryaeva 2016). Redelmeier and Raza (2017)  
419 investigated visual illusions created by bright sunlight that lead to driver error, including fallible distance  
420 judgment from aerial perspective. According to their results, the risk of a life-threatening crash was 16%  
421 higher during bright sunlight than normal weather.

422 Some authors consider other natural hazards, such as landslides (Bil et al., 2014; Schlögl et al., 2019),  
423 flash floods (Shabou et al., 2017) or rock falls (Bunce et al., 1997; Budetta and Nappi, 2013). ~~However,~~  
424 ~~no integrated review of all kinds of natural hazards exists.~~

425 As for railway transport, most of papers also focus on specific hazards, considering impacts of adverse  
426 weather and hydro-meteorological extremes (Ludvigsen and Klæboe, 2014; Nogal et al., 2016),  
427 landsliding (Jaiswal et al., 2011), flooding (Hong et al., 2015; Kellermann et al., 2016), snowfall  
428 (Ludvigsen and Klæboe, 2014) or tree falls (Nyberg and Johansson, 2013; Bil et al., 2017) **as triggers of**  
429 **accidents.**

430 Some studies combine all types of natural hazards affecting road and rail infrastructure (Govorushko  
431 2012; Petrova, 2015; Kaundinya et al., 2016). Voumard et al. (2018) examine small events like earth  
432 flow, debris flow, rockfall, flood, snow avalanche, and others, **which represent three-quarters of the total**  
433 **direct costs of all natural hazard impacts on Swiss roads and railways.** ~~None of the studies provides a~~  
434 ~~comprehensive analysis of the harmful influence of natural events.~~

435 Investigations of natural hazard impacts on other transport systems than roads and railways are not so  
436 numerous. As example, studies about danger of volcanic eruptions to the aviation should be mentioned  
437 (Neal et al, 2009; Brenot et al., 2014; Girina et al., 2019). **Large explosive eruptions of volcanoes can**  
438 **eject several cubic kilometers of volcanic ash and aerosol into the atmosphere and stratosphere during a**  
439 **few hours or days posing a threat to modern airliners (Gordeev and Girina, 2014).**

440 Only few researches investigate impacts of global processes, such as geomagnetic storms (space weather)  
441 and seismic activity. In the early 1990's, Epov (1994) found a correlation ( $R=0.74$ ) between solar activity  
442 and temporal distribution of air crashes. Desiatov et al. (1972) argue that the number of road accidents  
443 multiplies by four on the second day after a solar flare in comparison to "inactive" solar days. According  
444 to Miagkov (1995), solar activity affects operators, drivers, pilots, etc., causing a "human error" and  
445 "human factor" of accidents. Kanonidi et al. (2002) study a relationship between disturbances of the  
446 geomagnetic field and the failure of automatic railway machinery. Kishcha et al. (1999), Anan'in and  
447 Merzlyi (2002) examine a correlation between seismic activity and air crashes.

448 The main purpose of this study is to investigate impacts of natural hazards on the transport infrastructure  
449 and transport facilities in Russian regions. Using the information collected by the author in the database  
450 of technological and natural-technological accidents, contributions of natural factors to road, railway, air,  
451 and water transport accident occurrences and traffic disruptions are assessed. All types of natural hazards  
452 are considered excluding impacts of global processes (left side in Figure 1) that are not listed in the  
453 database. **The risk of road and railway accidents and traffic disruptions, as well as the total risk of**  
454 **transport accidents and disruptions caused by adverse and hazardous natural events is estimated for the**  
455 **area of Russia.**

## 456 **2. Materials and methods**

### 457 **2.1. Study region**

458 The Russian Federation is the study region.

459 Federal regions of the RF were taken as basic territorial units for which all the calculations were  
460 performed during the **study analysis**. Federal regions are the main administrative units of the Russian  
461 Federation; at this territorial level, all official statistics are published by the Federal State Statistics  
462 Service (FSSB) and other federal institutions of Russia.

463 The main administrative units of the RF comprise of 85 federal regions (**Figure 2**), including 22  
464 Republics, nine Territories (Kraies), 46 Regions (Oblast's), one Autonomous Region / Autonomous  
465 Oblast' (Evreiskaia (Jewish) AO), and four Autonomous Districts (AD) / Autonomous Okrugs. Moscow,  
466 Saint Petersburg, and Sevastopol have a special status of Federal Cities. **All the federal regions, which are**  
467 **mentioned in the paper, are indicated in Figure 2.**

468 **The size and geographical location of the Russian Federation in various climate and geological conditions**  
469 **determine a great variety of dangerous natural processes and phenomena in its area, including**  
470 **endogenous, exogenous and hydro-meteorological hazards. The most characteristic features of the**  
471 **geography of natural hazards in Russia are as follow:**

- 472 • Natural hazards associated with cold and snow winters are common throughout the country;
- 473 • The population and the economy are relatively low exposed to the most destructive types of  
474 natural hazards (earthquakes, tsunamis, hurricanes, etc.), and therefore the frequency of  
475 occurrence of natural emergencies with severe consequences is low;
- 476 • The historically formed strip of the main settlements from the European part of Russia through  
477 the south of Siberia to the Far East approximately coincides with the zone of the smallest  
478 manifestation of natural hazards (Miagkov, 1995).

479 In Russia, there are several hundred volcanoes, 78 of which are active. Kamchatka and the Kuril Islands  
480 are most at risk of volcanic eruptions; explosive eruptions of two to eight volcanoes are observed  
481 annually (Girina et al., 2019). About 20% of the country area with a population of 20 million people is  
482 exposed to earthquakes. The most seismically active regions are Kamchatka, Sakhalin, as well as the  
483 south of Siberia and the North Caucasus.

484 Almost the entire territory of Russia is exposed to dangerous exogenous processes; their intensity  
485 increases from north to south and from west to east (EMERCOM, 2010). Among exogenous processes,  
486 landslides, which are active in 40% of the country area, debris flows (in 20%), snow avalanches (in more  
487 than 18% of the area), and other slope processes have the greatest intensity and negative impact on the  
488 transport infrastructure. The highest avalanche and debris flow activity is observed in the North Caucasus  
489 (Dagestan, North Ossetia-Alania, Kabardino-Balkaria Republics) and in Sakhalin. The greatest intensity  
490 of landslides is in the North Caucasus (Stavropol and Krasnodar Territories, Rostov Region, Dagestan,  
491 Karachaevo-Cherkesia, Ingushetia, North Ossetia-Alania, Kabardino-Balkaria, and Chechen Republics),  
492 Ural (Chelyabinsk and Sverdlovsk Regions), as well as Irkutsk, Sakhalin, and Amur Regions, Primorsky  
493 and Khabarovsk Territories.

494 Hydro-meteorological hazardous processes and phenomena such as strong winds, squalls, catastrophic  
495 showers, floods, snowstorms, thunderstorms, hailstorms, etc. are widespread in the country. One of the  
496 most dangerous climate situations is the combination of heavy precipitation and strong wind in the coastal  
497 regions of the Far East (Kamchatka, Khabarovsk, and Primorsky Territories, and Sakhalin Region). The  
498 highest frequency of strong winds is observed in the south and in the middle part of the European Russia,  
499 as well as in the Far East. The most intense rains take place in Kamchatka, Krasnodar and Primorsky  
500 Territories; the heaviest snowfalls happen in regions of the North Caucasus, north and south-west of  
501 Siberia, as well as Far East (Sakhalin and Magadan Regions, Kamchatka, Khabarovsk and Primorsky  
502 Territories, Chukotka). Regions of the Far East, such as Republic of Sakha-Yakutia, Primorsky and  
503 Khabarovsk Territories, Amur Region, as well as south of the European Russia (Krasnodar and Stavropol  
504 Territories, Republics of the North Caucasus) are mostly exposed to catastrophic floods.

505 For Russia as a whole, the cumulative degree of natural hazard is increasing from west to east and south,  
506 with progress to the mountainous regions. The most dangerous areas in terms of natural hazards  
507 manifestation are situated in the Territories and Republics of the North Caucasus, Altai Mountains,  
508 Irkutsk Region and Transbaikalia, the Pacific coast of the Far East (Magadan Region and Khabarovsk  
509 Territory), and especially Sakhalin, the Kuril Islands and Kamchatka (Malkhazova and Chalov, 2004).

510 According to the assessment by EMERCOM (2010), the most vulnerable to the impacts of natural  
511 hazards are the following federal regions: Republics of Sakha-Yakutia, Komi and Karelia, Khabarovsk

512 and Primorsky Territories, Amur, Arkhangelsk, Irkutsk, Magadan, Murmansk, and Volgograd Regions, as  
513 well as Evreiskaia (Yevish) AO, Khanty-Mansiysk and Chukotka Autonomous Okrugs. The vulnerability  
514 was measured as ratio of the total number of realized natural sources of emergencies to the number of  
515 emergency situations caused by them. In the listed regions, the vulnerability is higher than an average for  
516 Russia.  
517

## 518 2.2. Methodology

519 The information collected by the author in an electronic database of technological and natural-  
520 technological accidents is analyzed in this study. The database is constantly updated with new  
521 information (Petrova, 2011). Currently, it contains about 20 thousand events from 1992 to 2018. Official  
522 daily emergency reports of the EMERCOM<sup>1</sup> of Russia and media reports serve as data sources. Only  
523 open data is used.

524 ~~The time and place of occurrence, type of accident, the number of deaths and injuries, economic and~~  
525 ~~environmental losses, if any, the probable cause of the accident, if available, a brief description and~~  
526 ~~source of information are recorded there (Figure 2).~~

527 The format of the database makes it possible to structure the collected information and classify it  
528 according to the author's assessment. The main database table, into which all the information is entered,  
529 has the following structure:

- 530 1) event number - the number changes automatically as information is entered;
- 531 2) date of the incident;
- 532 3) country;
- 533 4) region;
- 534 5) location - the distance to the nearest settlement is additionally indicated;
- 535 6) type of accident – according to the EMERCOM classification and assessment by the author;
- 536 7) a brief description of the event, including the time of occurrence, probable cause of the accident,  
537 if available, its consequences, and measures taken to eliminate them;
- 538 8) geographical coordinates, if applicable;
- 539 9) the scale of the emergency situation caused by the accident – local, inter-municipal, regional,  
540 inter-regional, cross-border;
- 541 10) the number of deaths;
- 542 11) the number of injuries;
- 543 12) economic and environmental losses, if any;
- 544 13) source of information.

545 All types of technological accidents occurring in Russia are recorded in the database, including those  
546 triggered by impacts of natural events of various genesis. Such accidents in technological systems and  
547 infrastructure due to natural impacts are classified as natural-technological. The transport accidents and  
548 traffic interruptions caused by natural hazards events are also listed.

549 It should be noted that it is not possible to fully cover all the accidents in the database, because they are  
550 too numerous, ~~The minimum quantitative criterion for entering an event into the database is as follows: at~~  
551 ~~least five dead, ten injured or large economic damage. Only such severe accidents are reported by the~~  
552 ~~EMERCOM of Russia. Nevertheless, the database provides a unique opportunity to monitor and analyze~~  
553 ~~the events that are not always included into the statistics (e.g., impacts of natural hazards, etc.) especially~~  
554 road accidents. According to the State traffic inspectorate of the Ministry of Internal Affairs of Russia,  
555 168 thousand road accidents are registered in Russia in 2019.

---

<sup>1</sup> The Ministry of the Russian Federation for Civil Defense, Emergencies and Elimination of Consequences of Natural Disasters.

556 The criteria for statistical accounting and reporting information about transport accidents by the  
557 EMERCOM of Russia are as follows:

558 1) for road accidents:

- 559 • Any fact of an accident during the transportation of dangerous goods;
- 560 • Damage to 10 or more motor units;
- 561 • Traffic interruptions for 12 hours due to an accident;
- 562 • Severe accidents with the death of five or more people or injured 10 or more people.

563 2) for railway accidents:

- 564 • Any fact of the train crash;
- 565 • Damage to wagons carrying dangerous goods, causing people to be injured;
- 566 • Traffic interruptions: on the main railway tracks – for 6 hours or more; in the subway –  
567 for 30 minutes and more;

568 3) for air transport accidents – any fact of the aircraft fall or destruction;

569 4) for water transport accidents:

- 570 • Emergency release of oil and oil products into water bodies in the amount of 1 ton or  
571 more;
- 572 • Accidental ingress of liquid and loose toxic substances into water bodies exceeding the  
573 maximum permissible concentration by 5 or more times;
- 574 • Any fact of flooding or throwing of ships ashore as a result of a storm (hurricane,  
575 tsunami), landing of ships aground;
- 576 • Accidents on small vessels with the death of five or more people or injured 10 or more  
577 people;
- 578 • Accidents on small vessels carrying dangerous goods.

579 The same selection criteria are used for events to be included into the author's database. Events that meet  
580 these criteria are characterized as emergency situations.

581 The accumulation of all the information in the form of an electronic database allows conducting various  
582 thematic search queries and analyzing their results depending on the goals and objectives of the research.

583 For the purposes of this study, a search of information about transport accidents and traffic disruptions  
584 caused by the impacts of natural hazards was made. Road, rail, air, and water transport were included in  
585 separate search queries. Statistical and geographical analysis of ~~the information accumulated in the~~  
586 ~~database~~ data obtained as a result of these search queries was carried out. ~~Based on the results of the~~  
587 ~~analysis, the role of natural factors among all the causes of various types of transport accidents and traffic~~  
588 ~~disruptions was evaluated. Road, railway, air, and water transport were taken into consideration.~~

589 The proportion of accidents and disruptions triggered by natural factors was evaluated. All types of  
590 natural hazards and adverse weather conditions were taken into account. The main natural causes of  
591 accidents and failures were identified for each mode of transport.

592 An assessment was made of the risk of road and railway accidents and traffic disruptions, as well as the  
593 total risk of ~~all the considered~~ transport accidents and disruptions caused by adverse and hazardous  
594 natural impacts on the transport infrastructure in Russian federal regions. Road, rail, air and water  
595 transport were considered in the total risk analysis.

596 Risk is understood as the possibility of undesirable consequences of any action or course of events  
597 (Miagkov, 1995). Risk is measured by the probability of such consequences or the probable magnitude of  
598 losses. There are various methods for assessing risk. In the field of natural hazards, risk is generally  
599 defined as by the product of hazard and vulnerability, i.e. a combination of the damageable phenomenon  
600 and its consequences (Eckert et al., 2012). The most researchers calculate risk (R) as a function of hazard  
601 (H), exposure (E) and vulnerability (V):  $R=f(H,E,V)$  (e.g. Arrighi et al., 2013; Falter et al., 2015; IPCC,  
602 2012; Schneiderbauer and Ehrlich, 2004). Various authors propose their own techniques of calculating  
603 risk, mainly within the framework of this common approach. In a recent publication, Arosio et al. (2020)

604 propose a holistic approach to analyze risk in complex systems based on the construction and study of a  
605 graph modeling connections between elements.

606 Another one approach to measuring risk suggests using the concept of emergency situation. In Russia, an  
607 emergency situation is defined as a disturbance of the current activity of a populated region due to abrupt  
608 technological / natural impacts (catastrophes or accidents) resulting in social, economic, and / or  
609 ecological damage, which requires special management efforts to eliminate it (Petrova, 2005). An  
610 emergency situation caused by the impact of natural hazards on technological systems and infrastructure  
611 can be considered as a result of all the factors of risk: hazard, exposure and vulnerability; it combines  
612 hazard defined in its physical parameters, exposure of a population or facilities located in a hazard area  
613 and subject to potential losses, and vulnerability that links the intensity of a hazard to undesirable  
614 consequences. An emergency resulting from a hazardous impact may be a measure of the losses due to  
615 this impact. The total frequency of emergencies of varying severity may serve as a comprehensive  
616 indicator of risk assessment (Shnyparkov, 2004).

617 ~~Occurrence frequencies~~ In this study, the above approach using frequency of emergency situations as a  
618 measure of risk was applied. As an indicator of risk, the average frequency of occurrence of transport  
619 accidents and traffic disruptions triggered by natural hazard impacts, which led to emergency situations of  
620 different scale and severity, was ~~for the six year period from 2013 to 2018~~ were used as risk indicators.  
621 ~~For this purpose, the~~ Risk indicators were calculated for each federal region as average annual numbers of  
622 ~~accidents~~ emergency situations in ~~was calculated for each federal region and~~ each type of transport, as  
623 well as a resulting average annual number of emergencies due to all transport accidents and disruptions.  
624 Thus, the calculated indicators included the probability of undesirable consequences (emergencies) due to  
625 impacts of natural hazards on transport infrastructure exposed and vulnerable to these influences.  
626 Quantitative and qualitative criteria for classifying transport accidents and disruptions as emergency  
627 situations are listed above. For the analysis, the period from 1992 to 2018 was chosen, since it covered the  
628 information accumulated in the database.

629 Additionally, all the federal regions were divided into groups ~~by~~ according to their ~~levels of~~ risk level.  
630 The risk level was estimated for each federal region and each type of transport by the average annual  
631 number of emergency situations in comparison with the average value of the indicator in Russia. The  
632 number of groups was determined in each case depending on the dispersion of the calculated value. ~~For~~  
633 ~~the analysis, the period from 2013 to 2018 was chosen, since it covered the most representative~~  
634 ~~information.~~

635 Using the ~~method of~~ cartogram method, maps were created ~~showing, on which~~ the results of the  
636 assessment were presented.

### 637 3. Results

#### 638 3.1. Contributions of natural hazards

639 The transport infrastructure of Russia is exposed to multiple impacts of various natural hazards and  
640 weather phenomena such as heavy rains and snowfalls, strong winds, floods, earthquakes, volcanic  
641 eruptions, landslides, debris flows, snow avalanches; rock falls, icing conditions of roads, and others. In  
642 many cases, these impacts occur simultaneously or successively, one after another, and reinforce each  
643 other. Some natural hazards trigger hazards of other types, e.g. earthquake or volcanic eruption can  
644 provoke such slope processes as rock falls, ice collapses, landslides, debris flows / lahars, snow  
645 avalanches, and others; heavy rain can cause debris flows, landslides or floods, etc. Gill and Malamud  
646 (2016) examine hazard interrelationships in more detail. These triggering impacts are also recorded in the  
647 database and taken into account in the analysis.

648 Contributions of various natural factors to occurrences of different types of transport accidents and traffic  
649 disruptions including road, railway, air, and water transport were found revealed as results of relevant  
650 searches in the database.

651 Table 1 shows these results. The “+” sign marks impacts of the listed natural hazards listed in the first  
652 column that caused accidents and disruptions on the corresponding type of transport. Only accidents and  
653 disruptions occurred in Russia and recorded in the database over 1992 to 2018 are taken into  
654 consideration.

655 As the analysis of the database revealed, transport infrastructure of Russia is the most often affected by  
656 adverse impacts were caused by natural hazards of meteorological and hydrological origin, especially by  
657 hazards associated with cold and snow winters, as well as exogenous slope processes including those  
658 provoked by the hydro-meteorological hazards. The majority of emergency situations due to natural  
659 hazards are registered from November to March (more than 67%); among the warmer months, the largest  
660 number of transport accidents occurs in July.

661 The frequencies of occurrence of accidents and disruptions caused by the impacts of natural hazards, as  
662 well as their proportion among other factors of accidents are discussed in the following sections.

### 663 3.1.1. Automobile Road transport

664 Road transport is one of the main means of moving passengers and goods over short and medium  
665 distances in Russia. In terms of transport security, it is the most dangerous means of transportation with  
666 the highest number of fatalities and injuries in accidents (Petrova, 2013) and one of the most common  
667 sources of technological hazard, as the number of cars on roads increases significantly faster than the  
668 quality of road infrastructure (EMERCOM, 2010).

669 More than 20% of road accidents and traffic disruptions registered in the database were caused by the  
670 impacts of various natural hazards. This refers to those incidents where the natural impact was indicated  
671 as the cause of the accident.

672 Automobile Road transport facilities and road infrastructure are exposed to adverse and hazardous natural  
673 processes and phenomena of hydro-meteorological character practically all around Russia. Many sections  
674 of roads, bridges and other road infrastructure are subject to impacts of snowfalls and snowstorms, heavy  
675 rainfalls, flooding, and icing roads; from among exogenous hazards, landslides, icy conditions, debris  
676 flows, snow avalanches, rock falls, and other natural hazards affect road infrastructure. These negative  
677 impacts trigger road accidents and traffic disruptions leading to emergency situations and causing many  
678 social problems. Under unfavorable meteorological conditions, the risks of car crashes as well as the  
679 delay of transportation are increasing, whereas the speed of traffic flow is decreasing (Petrova and  
680 Shiryaeva 2019).

681 During the study period from 1992 to 2018, the following natural hazard impacts that caused accidents  
682 and traffic disruptions are identified. They were recorded in 70 from 85 federal regions of Russia. The  
683 brackets indicate the regions where these accidents and failures occurred:

- 684 • **heavy snowfall and snowdrift** (Altai Republic; Altai, Kamchatka, Krasnodar, Krasnoyarsk,  
685 Primorsky, Stavropol, and Khabarovsk Territories; Jewish AO; Yamalo-Nenets AD; Amur,  
686 Arkhangelsk, Astrakhan, Volgograd, Magadan, Murmansk, Novosibirsk, Omsk, Orenburg,  
687 Rostov, Sakhalin, Saratov, Sverdlovsk, and Chelyabinsk Regions);
- 688 • **bottom snowstorm** (Republics of Bashkortostan and Komi; Altai, Kamchatka, and Krasnoyarsk  
689 Territories; Volgograd, Magadan, Murmansk, Orenburg, Sakhalin, Ulyanovsk, and Chelyabinsk  
690 Regions);



- 691 • **ice phenomena** (Republics of Bashkortostan, Kalmykia, and Khakassia; Primorsky, and  
692 Khabarovsk Territories; Jewish AO; Leningrad, Magadan, Rostov, Sakhalin, and Chelyabinsk  
693 Regions);
- 694 • **abnormally low air temperature** (Yamalo-Nenets AD; Krasnoyarsk Territory; Kemerovo,  
695 Novosibirsk, Omsk, and Tomsk Regions);
- 696 • **flooding of road due to heavy rain** (Moscow; Altai Republic, Bashkortostan, Buryatia, Sakha-  
697 Yakutia, Khakassia, and Tyva; Chukotka AD; Altai, Krasnodar, Primorsky, and Stavropol  
698 Territories; Amur, Arkhangelsk, Leningrad, Magadan, Moscow, Nizhny Novgorod, Novgorod,  
699 Sakhalin, and Saratov Regions);
- 700 • **washout of road** (Republic of Sakha-Yakutia; Kamchatka Territory; Sverdlovsk and Tyumen  
701 Regions);
- 702 • **debris flow** (Chechen Republic, Kabardino-Balkaria, Karachay-Cherkessia, and Republic of  
703 North Ossetia-Alania; Krasnodar Territory; Sakhalin Region);
- 704 • **snow avalanche** (Republic of Dagestan, North Ossetia-Alania);
- 705 • **rock fall** (Republic of Dagestan, North Ossetia-Alania);
- 706 • **volcanic eruption** (Kamchatka Territory).

707 The majority of all the emergencies revealed (almost 73%) happened during the cold season from  
708 November to March. A significant increasing in their number occurred during abrupt changes in weather  
709 conditions, such as heavy precipitation, temperature drops, icing. Emergency situations caused by snow  
710 related natural hazards were most often and most common. Snow drifts on the roads became a real  
711 disaster leading to long-term traffic disruptions in many regions of Russia, especially in Arkhangelsk,  
712 Novosibirsk, Omsk, Orenburg, Rostov, Sakhalin, Sverdlovsk, and Chelyabinsk Regions, Altai,  
713 Krasnodar, and Khabarovsk Territories.

714 The frequencies of occurrence of road accidents and disruptions due to natural hazards are discussed in  
715 section 3.2.1.

### 716 3.1.2. Railway transport

717 In the Russian Federation, due to its vast and extended territory and natural features, a large distance of  
718 the raw material base from processing enterprises, railway transportation is the basis of the transport  
719 system. It accounts for more than 80% of the freight turnover of all types of transport (without pipelines)  
720 and over 40% of the passenger traffic of public transport in long-distance and suburban communications.  
721 Railway transport is considered the safest form of modern transportation, although railway catastrophes  
722 with a large number of victims and injuries occur in many countries. The main causes of railway  
723 accidents in Russia are technical problems, a high degree of depreciation (of tracks, rolling stocks,  
724 signaling means, and other equipment), and a “human factor” such as errors of dispatchers and drivers,  
725 etc. (Petrova, 2015).

726 More than 7% of all railway accidents and failures registered in the database were triggered by natural  
727 factors. This refers to those incidents where natural impacts were indicated as causes of accidents. Over  
728 1992 to 2018, impacts of natural hazards of various genesis caused railway accidents and traffic  
729 disruptions in 29 from 85 federal regions of Russia.

730 The identified natural hazards that caused these harmful events are listed below. The brackets indicate the  
731 regions where these accidents and failures occurred:

- 732 • **heavy snow** (Yamalo-Nenets AD; Orenburg and Sakhalin Regions);
- 733 • **washout of railway as a result of heavy rain and flash flood** (Dagestan, Karelia, Udmurtia, and  
734 Chuvashia Republics; Amur and Sakhalin Regions; Khabarovsk and Krasnodar Territories);
- 735 • **snow avalanche** (Sakhalin Region; Khabarovsk Territory);
- 736 • **rails deformation due to heat wave** (Kalmykia Republic; Rostov Region);
- 737 • **landslide** (Krasnodar Territory; Orel Region);
- 738 • **debris flow** (Sakhalin Region; Krasnodar Territory);

739 • *rock fall* (Khabarovsk and Krasnodar Territories; Bashkortostan Republic);

740 • *flooding due to melting snow* (Murmansk and Vologda Regions).

741 Regarding seasonality of accidents, they had two peaks: in summer (in June and July) and in November.

742 The most part of emergency situations were caused by snow drifts, washout or flooding of railway tracks

743 due to heavy rains or floods, as well as by the slope processes such as landslides, snow avalanches, debris

744 flows, and rock falls.

745 The frequencies of occurrence of railway accidents due to natural hazards are discussed in section 3.2.2.

### 746 3.1.3. Air transport

747 Air transport is the fastest and most expensive mode of transportation. That is why it is primarily used to

748 transport passengers over distances of more than 1,000 km. In many distant areas of Russia (in the

749 mountains, in the Far North), it is the only means of transport. The main causes of accidents are technical

750 failures or “human errors”, as well as various natural factors including adverse weather or collision with a

751 flock of birds (EMERCOM, 2010).

752 The adverse weather conditions and other natural hazard impacts caused more than 8% of all the air

753 transport accidents and traffic disruptions recorded in the database. This refers to those incidents where

754 natural impacts were indicated as causes of accidents. Over 1992 to 2018, these events were registered in

755 27 from 85 federal regions of Russia.

756 The following impacts of natural hazards were revealed:

757 • *strong winds* (Moscow, Irkutsk, Murmansk, Omsk, Rostov, Sakhalin, Saratov, and Ulyanovsk  
758 Regions, Kamchatka, Krasnodar, and Krasnoyarsk Territories, Bashkortostan, Chuvashia, and  
759 Tatarstan Republics);

760 • *thunderstorms* (Irkutsk Region, Republic of Sakha-Yakutia);

761 • *heavy rains* (Moscow, Irkutsk Region, Krasnodar and Khabarovsk Territories);

762 • *snowfalls and snowstorms* (Moscow, Leningrad, Magadan, Rostov, and Sakhalin Regions,  
763 Kamchatka, Krasnodar, and Krasnoyarsk Territories, Republic of Khakassia);

764 • *sleets* (Moscow, St. Petersburg, Rostov Region, Kamchatka and Krasnodar Territories,  
765 Bashkortostan, Chuvashia, and Tatarstan Republics);

766 • *runway icing* (Moscow, Kaluga and Murmansk Regions, Kamchatka and Primorsky Territories);

767 • *fog* (Moscow, Sverdlovsk Region, Chechen and Ingushetia Republics);

768 • *snow avalanche* (Kamchatka);

769 • *volcanic eruption*.

770 In many cases, these adverse impacts occurred simultaneously. Thus, the majority of emergency

771 situations were caused by the combination of heavy snow and strong winds. Almost 66% of events

772 occurred during the cold season from November to March; another one peak of accidents was in July.

773 A unique incident, when a helicopter was damaged as a result of an avalanche, was recorded in the

774 database on April 10, 2010 in Kamchatka.

775 For the study period, there was not a single accident caused by volcanic eruption in Russia. Due to the

776 eruption of the Icelandic volcano Eyyafyatlayokudl, airlines canceled and delayed more than 500 flights

777 at 10 Russian airports in April 2010; 32 thousand passengers could not fly.

778 The frequencies of occurrence of air transport accidents caused by natural hazards were included in the

779 total risk analysis (section 3.2.5).

### 780 3.1.4. Water transport

781 Water transport includes both sea and river transport. Despite the relatively low speed and seasonal

782 limitations on traffic, this type of transport is widely used for transporting large volumes of goods and

783 passengers at different distances. The main causes of accidents in water transport are violations of the  
784 rules of navigation and transportation, of fire safety, and technical operation of vessels; depreciation of  
785 ships, ports' equipment, and other objects of infrastructure, as well as impacts of natural hazards and  
786 adverse weather conditions (EMERCOM, 2010).

787 The greatest contribution of natural factors to the accident rate after road transport was recorded for water  
788 transport. Almost 16% of all the water transport accidents registered in the database were caused by  
789 various natural hazards. These events were registered in 21 from 85 federal regions of Russia.

790 The following impacts were revealed from 1992 to 2018:

- 791 • **strong winds** (Leningrad, Sakhalin, and Sverdlovsk Regions, Kamchatka, Krasnodar, and  
792 Primorsky Territories);
- 793 • **storms** (Astrakhan, Irkutsk, Magadan, Murmansk, Rostov, Ryasan, Sakhalin, and Yaroslavl  
794 Regions, Kamchatka, Khabarovsk, Krasnodar, and Primorsky Territories, Dagestan, Karelia, and  
795 Tatarstan Republics, Yamalo-Nenets AD);
- 796 • **snowstorms** (Irkutsk and Sakhalin Regions);
- 797 • **icing** (Sakhalin Region, Primorsky Territory, Republic of Sakha-Yakutia);
- 798 • **thunderstorms** (Leningrad Region, Komi Republic);
- 799 • **fog and mist** (Leningrad and Sakhalin Regions).

800 The most part of accidents (more than 70%) occurred during the cold season from September to January.

801 The frequencies of occurrence of water transport accidents due to natural hazards were included in the  
802 total risk analysis (section 3.2.5).

### 803 3.2. Risk of transport accidents and traffic disruptions

804 Occurrence frequencies of road, railway, air, and water accidents and traffic disruptions due to natural  
805 hazard impacts at the level of Russian federal regions were estimated for the risk analysis. As mentioned  
806 in section 2.2, only accidents and disruptions, which reached the scale of an emergency situation, were  
807 taken into account. Annual average numbers of such events over 1992 to 2018 were used as risk  
808 indicators.

809 All the federal regions were divided into groups by their risk levels of road and railway accidents, as well  
810 as the total risk of transport accidents and traffic disruptions. In each case, the risk level was determined  
811 in comparison with the average value of the corresponding indicator for Russia.

812 The resulting maps were created and analyzed. Regional differences in the risk of transport accidents  
813 were found. Below are the main results of the risk assessment analysis.

#### 814 3.2.1. Road transport

815 Risk of emergencies in road transport depends on the density of the road network, traffic intensity, human  
816 factors (violation of traffic rules by drivers and pedestrians, etc.), as well as climatic conditions,  
817 seasonality, and other circumstances. With a large area of the country, the paved public road density in  
818 Russia is the lowest of all the G8 countries, equal to 63 km per 1,000 km<sup>2</sup> (FSSS, 2020). However, it is  
819 much higher in the densely populated regions of the European part of Russia. In the Asian part, only some  
820 south-western and south-eastern regions have a satisfactory network of hard-surface roads (Petrova and  
821 Shiryaeva, 2019). Federal Cities Moscow and St. Petersburg have the highest density of paved public  
822 roads, which comprises to about 2,500 km / 1,000 km<sup>2</sup>; it is also high in federal regions of the central  
823 Russia (Moscow and Belgorod Regions) and the North Caucasus (Ingushetia and North Ossetia-Alania  
824 Republics), equal to 700-850 km / 1,000 km<sup>2</sup> (FSSS, 2020).

825 Risk of road accidents and traffic disruptions due to natural hazard impacts within the Russian federal  
826 regions was assessed.

827 ~~Occurrence frequencies (annual average numbers) of road accidents and traffic disruptions over 2013 to~~  
828 ~~2018 are used as risk indicators. 484 serious road accidents and traffic disruptions~~

829 635 emergency situations of various scale and severity caused by the impacts of natural hazards on road  
830 infrastructure were taken into consideration. The main triggers of these emergencies and the regions of  
831 their occurrence were identified in section 3.1.1. The risk indicator was calculated as an average annual  
832 number of emergency situations of this type in each federal region as well as the average for Russia.

833 All the federal regions are divided into five groups in accordance with ~~by their~~ risk levels by comparing  
834 their risk indicators with the average for Russia. The resulting map is shown in ~~the~~ Figure 3.

835 Regions of the Far East of Russia (Magadan and Sakhalin Regions, Kamchatka and Khabarovsk  
836 Territory), ~~and~~ Krasnoyarsk Territory in the southern part of Central Siberia, and Republic of North  
837 Ossetia-Alania in the North Caucasus have the highest risk level. The road infrastructure in these regions  
838 is mostly affected by the above listed natural hazards ~~impacts~~ especially by ~~those of~~ heavy snowfalls and  
839 snowstorms, ice phenomena, abnormally low air temperature, and heavy rains, ~~and debris flows~~. In North  
840 Ossetia-Alania impacts of snow avalanches and debris flows are most significant.

### 841 3.2.2. Railway transport

842 Risk of emergencies in railway transport depends on the density of the railway network, traffic intensity,  
843 human factors, climatic conditions, and seasonality. The highest density of the public railway network is  
844 in Federal Cities Moscow (1,921 km / 10,000 km<sup>2</sup>) and St. Petersburg (3,082 km / 10,000 km<sup>2</sup>), as well as  
845 federal regions of the central and north-western parts of the European Russia such as Moscow,  
846 Kaliningrad, Tula, Kursk, Vladimir, and Leningrad Regions (300-500 km / 10,000 km<sup>2</sup>). With a lack of  
847 railways in a large part of the country area, especially in its Asian part, the average density of railways in  
848 Russia is 51 km / 10,000 km<sup>2</sup>; in the central part of the European Russia it is 263 km / 10,000 km<sup>2</sup> (FSSS,  
849 2020).

850 Risk of railway accidents and traffic disruptions due to natural hazard impacts at the level of Russian  
851 federal regions ~~was is~~ assessed.

852 63 emergency situations of various scale and severity ~~serious events~~ caused by the impacts of natural  
853 hazards on railway infrastructure were taken into consideration. The main triggers of these emergencies  
854 and the regions of their occurrence were identified in section 3.1.2. Occurrence frequencies (annual  
855 average numbers) of ~~railway accidents and disruptions are used as risk indicators~~ these events were  
856 calculated for each federal region as well as the average for Russia.

857 All the federal regions are divided into three groups by their risk levels. In this case, only three groups are  
858 chosen, since the number of accidents and dispersion of risk indicators are not as great as in the case of  
859 road accidents. The resulting map is shown in ~~the~~ Figure 4.

860 Krasnodar Territory in the southern part of European Russia and regions of the Far East (Sakhalin  
861 Region; Khabarovsk Territory) ~~have~~ are characterized by the highest level of risk. Railways in these  
862 regions are mostly affected by the impacts of heavy snowfalls, heavy rains, snow avalanches, landslides,  
863 debris flows, and rock falls.

### 864 3.2.3. Air transport

865 Risk of emergencies in air transport depends on the aircraft technical condition, air traffic intensity,  
866 human factors, meteorological conditions, and seasonality.

867 The number of air transport accidents and traffic disruptions due to impacts of natural hazards was  
868 included in the calculation of the total risk indicator of transport accidents and disruptions. 70 emergency  
869 situations serious incidents were taken into consideration. The main triggers of these emergencies and the  
870 regions of their occurrence were identified in section 3.1.3.

### 871 3.2.4. Water transport

872 Risk of emergencies in water transport depends on technical conditions of vessels, traffic intensity,  
873 human factors, climatic conditions, and seasonality.

874 Water transport accidents due to natural impacts were also included in the calculation of the total risk of  
875 transport accidents and disruptions. 70 emergency situations serious incidents were taken into  
876 consideration. The main triggers of these emergencies and the regions of their occurrence were identified  
877 in section 3.1.4.

### 878 3.2.5. The total risk

879 Additionally, the total risk of transport accidents and traffic disruptions was assessed for the area of  
880 Russia. Occurrence frequencies of all the above-listed types of accidents and disruptions in all the above  
881 examined types of transport over 2013 1992 to 2018 were used as risk indicators.

882 838 emergency situations of various scale and severity caused by the impacts of natural hazards on  
883 transport infrastructure were taken into consideration. The main triggers of these accidents were identified  
884 in section 3.1 and shown in Table 1; annual average numbers of these events were calculated for each  
885 federal region as well as the average for Russia.

886 All the federal regions were divided into five groups by their risk levels. The procedure for selecting  
887 groups was described in section 2.2.

888 The resulting map is shown in the Figure 5. Regions of the Far East (Magadan and Sakhalin Regions;  
889 Kamchatka, Khabarovsk, and Primorsky Territories), Krasnoyarsk Territory in the southern part of  
890 Central Siberia, Murmansk Region in the north and Krasnodar Territory in the southern part of European  
891 Russia and North Ossetia-Alania Republic in the North Caucasus have the highest level of risk. The  
892 transport infrastructure in these regions is mostly affected by the adverse impacts of the above-listed  
893 natural hazards listed in Table 1, primarily those of hydro-meteorological genesis. Kamchatka,  
894 Khabarovsk, and Primorsky Territories, as well as Sakhalin Region are characterized by the most  
895 dangerous meteorological combinations of heavy precipitations and strong winds. In Kamchatka,  
896 Krasnodar and Primorsky Territories, the most intense rains are recorded. In all the above regions in  
897 winter, the heaviest snowfalls happen. In spring and early autumn, Khabarovsk, Krasnodar and Primorsky  
898 Territories are subject to catastrophic floods. Kamchatka is most at risk of volcanic eruptions. North  
899 Ossetia-Alania and Sakhalin are characterized by the highest avalanche and debris flow activity. All of  
900 the mentioned natural hazards trigger accidents and lead to delay in the transportation of passengers and  
901 goods by road, railway, air and water transport. In addition, Kamchatka, Sakhalin, south part of Siberia,  
902 and the North Caucasus are among the most seismically active regions of Russia; during the study period,  
903 no traffic accidents due to the earthquake were recorded, but their possibility should be taken into  
904 account.

905

## 906 4. Concluding remarks and discussion

907 Contributions of various natural hazards to occurrences of different types of transport accidents and  
908 traffic disruptions including road, railway, air, and water transport are revealed. Among all the identified  
909 types of natural hazards, the largest contributions to transport accidents and disruptions have hydro-

910 meteorological hazards such as heavy snowfalls and rains, floods, and ice phenomena, as well as  
911 dangerous exogenous slope processes including snow avalanches, debris flows, landslides, and rock falls.

912 An annual average frequency of occurrences of emergency situations of various scale and severity ~~severe~~  
913 ~~events was~~ is applied ~~chosen~~ in this study among all possible methods for assessing risk. Unlike methods  
914 that assess risk by measuring its components such as hazard, exposure and vulnerability, this approach  
915 takes into account the consequences of the above factors and the probability of these consequences.  
916 Transport accidents and disruptions are considered in this case as consequences of natural hazard impacts  
917 on transport infrastructure that is exposed and vulnerable to these impacts. The risk index is calculated as  
918 an annual average number of emergency situations caused by natural hazard impacts in each federal  
919 region and each type of transport. Thus, the index used combines both the probability and severity of the  
920 adverse impacts of natural hazards on transport infrastructure, as well as vulnerability of infrastructure to  
921 these adverse impacts resulting in accidents and malfunctions. Using this method, it is possible to  
922 compare between different regions and identify deficiencies that need to be addressed.

923 Regional differences in the risk of transport accidents between Russian federal regions were found. All  
924 the federal regions were divided into groups by their risk levels of road and railway accidents, as well as  
925 the total risk of transport accidents and traffic disruptions due to natural hazard impacts. The resulting  
926 maps were created and analyzed.

927 The Magadan, Murmansk, and Sakhalin Regions; Kamchatka, Khabarovsk, Krasnodar, Krasnoyarsk, and  
928 Primorsky Territories, and North Ossetia-Alania Republic are characterized by the highest risk of  
929 transport accidents and traffic disruptions caused by natural events. ~~More than five severe events per year~~  
930 ~~during 2013-2018 were recorded~~ Emergencies of various scales occur in these regions on average more  
931 often than once a year (Figure 5). Murmansk Chelyabinsk, Orenburg, and Rostov Regions, Altai  
932 Territory, Dagestan and Bashkortostan the Republics of North Ossetia (Alania), and Moscow also have a  
933 high risk level with an average probability of one event in 1-2 years ~~3.0-4.5~~ (0.6-1.0 events per year).

934 For the study period of 1992 to 2018, the database mainly recorded events caused by exposure to hydro-  
935 meteorological and exogenous natural hazards. With high value of the risk index, Kamchatka, Sakhalin,  
936 the North Caucasus, and south of Siberia are also among the most seismically active regions of Russia,  
937 which further increases the likelihood of emergencies in these regions in case of an earthquake. It is in  
938 these regions that the necessary measures should first be taken to reduce the vulnerability of transport  
939 infrastructure to undesirable natural impacts and increase level of protection and preparedness.

940 Under conditions of observed and forecasted global and regional climate changes, adverse and hazardous  
941 natural impacts on various facilities of transport infrastructure, primarily from natural hazards of  
942 meteorological and hydrological origin, as well as other natural events triggered by them such as  
943 landslides, snow avalanches, and debris flows are expected to increase (Malkhazova and Chalov, 2004;  
944 Yakubovich et al., 2018). Other factors, such as growing transportation network, increased traffic, and the  
945 lack of funding will also lead to increasing of adverse impacts, especially in the with further development  
946 of transport infrastructure to areas with high level of natural identified regions most at risk. In this regard,  
947 continuous monitoring and assessment of natural hazard impacts is especially relevant and important.

948 Only severe accidents leading to an emergency situation were considered in this study due to a lack of  
949 data on small events. This gap should be filled in a future research because small events can also cause a  
950 great damage to the infrastructure and trigger accidents and traffic interruptions (Voumard et al., 2018).

951 Effects of global processes such as space weather on the transport infrastructure facilities, especially on  
952 electronics and automatic machinery were not taken into consideration because these events were not  
953 recorded in the database. In the future, these impacts should be also investigated; risk of these events  
954 should be considered in the risk assessment.

955 **Acknowledgements**

956 The work described in this paper was supported by Lomonosov Moscow State University (grant I.7  
957 AAAA-A16-116032810093-2 “Mapping, modeling and risk assessment of dangerous natural processes”).

958

959 **Data availability:**

960 The data used in this study are ~~collected by the author in an electronic database, which is not confidential~~  
961 ~~and property of Lomonosov Moscow State University and cannot be made~~ available publicly.

962

963 **Competing interest:** The author declares that she has no conflict of interest.

964

965 **Author’s contribution:** The work presented in this study was conducted by E. Petrova.

966

967 **References**

968 Anan'in, I. V. and Merzlyi, A. M.: Tectonically active zone of Russian northern areas and their impact on  
969 air crashes, Ecology of Russian Northern Areas, Problems, situation forecast, ways of development,  
970 decisions, Proceedings, Arkhangelsk, 2, 4-8, 2002. (In Russian).

971 Andersson, A. K. and Chapman L.: The impact of climate change on winter road maintenance and traffic  
972 accidents in West Midlands, UK, Accident Analysis and Prevention, 43, 284-289, 2011.

973 Andrey, J.: Long-term trends in weather-related crash risks, J. of Transport Geography, 18 (2), 247–258,  
974 2010.

975 Aron, M., Bergel-Hayat, R., Saint Pierre, G., Violette, E.: Added risk by rainy weather on the roads of  
976 Normandy-centre region in France, Proceedings of 11th WCTR, World Conference on Transport  
977 Research Society, 2007.

978 Arosio, M., Martina, M. L. V., and Figueiredo, R.: The whole is greater than the sum of its parts: a  
979 holistic graph-based assessment approach for natural hazard risk of complex systems, Nat. Hazards  
980 Earth Syst. Sci., 20, 521–547, <https://doi.org/10.5194/nhess-20-521-2020>, 2020.

981 Arrighi, C., Brugioni, M., Castelli, F., Franceschini, S., and Mazzanti, B.: Urban micro-scale flood risk  
982 estimation with parsimonious hydraulic modelling and census data, Nat. Hazards Earth Syst. Sci.,  
983 13, 1375–1391, <https://doi.org/10.5194/nhess-13-1375-2013>, 2013.

984 Bergel-Hayat, R., Debarh, M., Antoniou C., and Yannis, G.: Explaining the road accident risk: Weather  
985 effects, Accident Analysis and Prevention, 60, 456-465, 2013.

986 Bil, M., Andrasik, R., Nezval V., and Bilova M.: Identifying locations along railway networks with the  
987 highest tree fall hazard, Applied Geography, 87, 45-53, [doi:10.1016/j.apgeog.2017.07.012](https://doi.org/10.1016/j.apgeog.2017.07.012), 2017.

988 Bíl, M., Kubeček, J., and Andrášik, R.: An epidemiological approach to determining the risk of road  
989 damage due to landslides, Nat. Hazards, 73, 1323–1335, 2014.

- 990 Brenot, H., Theys, N., Clarisse, L., van Geffen, J., van Gent, J., Van Roozendael, M., van der A, R.,  
991 Hurtmans, D., Coheur, P.-F., Clerbaux, C., Valks, P., Hedelt, P., Prata, F., Rason, O., Sievers, K.,  
992 and Zehner, C.: Support to Aviation Control Service (SACS): an online service for near-real-time  
993 satellite monitoring of volcanic plumes, *Nat. Hazards Earth Syst. Sci.*, 14, 1099–1123,  
994 <https://doi.org/10.5194/nhess-14-1099-2014>, 2014.
- 995 Brodsky, H. and Hakkert, A. Sh.: Risk of a road accident in rainy weather, *Accident Analysis and*  
996 *Prevention*, 20(3), 161-176, 1988.
- 997 Budetta, P. and Nappi, M.: Comparison between qualitative rockfall risk rating systems for a road  
998 affected by high traffic intensity, *Nat. Hazards Earth Syst. Sci.*, 13, 1643–1653,  
999 <https://doi.org/10.5194/nhess-13-1643-2013>, 2013.
- 1000 Bunce, C. M., Cruden, D. M., and Morgenstern, N. R.: Assessment of the hazard from rock fall on a  
1001 highway, *Can. Geotech. J.*, 34, 344–356, 1997.
- 1002 Chakrabarty, N. and Gupta, K.: Analysis of Driver Behaviour and Crash Characteristics during Adverse  
1003 Weather Conditions, *Procedia - Social and Behavioral Sciences*, 104, 1048-1057, 2013.
- 1004 Desiatov, V.P., Osipov, A.I., and Suzdal'skaya, O.V.: Solar Activity and Death-Rate Statistics, *The Sun,*  
1005 *Electricity, Life, Proceedings of Memorial Readings devoted to A. L. Chijevskii*, Moscow, 90-92,  
1006 1972. (In Russian).
- 1007 Eckert, N., Keylock, C.J., Bertrand, D., Parent, E., Faug, T., Favier, T., Naaim, M.: Quantitative risk and  
1008 optimal design approaches in the snow avalanche field: Review and extensions, *Cold Regions*  
1009 *Science and Technology*, Vol. 79–80, 1-19, 2012.
- 1010 Edwards, J. B.: Weather-related road accidents in England and Wales: a spatial analysis, *J. of Transport*  
1011 *Geography*, 4(3), 201-212, 1996.
- 1012 Eidsvig et al.: Assessing the risk posed by natural hazards to infrastructures, *Nat. Hazards Earth Syst.*  
1013 *Sci.*, 17, 481–504, 2017.
- 1014 EMERCOM: Atlas of natural and technological hazards and risks. The Russian Federation, Publishing  
1015 House Design. Information. Cartography, Moscow, 2010.
- 1016 Epov, A.B.: Regularities in Occurrence of Technological Emergencies and their Relationship with  
1017 Natural Processes, *Problems of Safety under Emergencies*, 12, 14-20, 1994. (In Russian).
- 1018 Falter, D., Schröter, K., Dung, N. V., Vorogushyn, S., Kreibich, H., Hundecha, Y., Apel, H., and Merz,  
1019 B.: Spatially coherent flood risk assessment based on long-term continuous simulation with  
1020 a coupled model chain, *J. Hydrol.*, 524, 182–193, <https://doi.org/10.1016/j.jhydrol.2015.02.021>,  
1021 2015.
- 1022 Federal Law of the Russian Federation N 16-FZ "On Transport Security" (as amended on 12/02/2019).
- 1023 FSSS: Regions of Russia. Socio-economic indicators 2019, Rosstat, Moscow, 2020.
- 1024 FSSS: Russian Statistical Yearbook 2018: Stat .book, Rosstat, Moscow, 2018.
- 1025 Gill, J. C. and Malamud, B. D.: Hazard interactions and interaction networks (cascades) within multi-  
1026 hazard methodologies, *Earth Syst. Dynam.*, 7, 659–679, <https://doi.org/10.5194/esd-7-659-2016>,  
1027 2016.



- 1028 Girina, O. A., Manevich, A. G., Melnikov, D. V., Nuzhdaev, A. A., and Petrova, E. G.: 2016 volcano  
1029 eruptions in Kamchatka and the Northern Kuriles and their danger to aviation, *J. of Volcanology*  
1030 and *Seismology*, 3, 34-48, 2019.
- 1031 Gordeev, E.I. and Girina, O.A., *Volcanoes and the threat they pose for aircraft*, *Vestnik Rossiiskoi*  
1032 *Akademii Nauk*, 84, 2, 134--142, 2014. Doi:10.7868/S0869587314020121.
- 1033 Govorushko, S. M.: *Natural processes and Human impacts: Interaction between Humanity and the*  
1034 *Environment*, Springer, Dordrecht, 2012.
- 1035 Hong, L., Ouyang, M., Peeta, S., He, X., and Yan, Y.: *Vulnerability assessment and mitigation for the*  
1036 *Chinese railway system under floods*, *Reliability Engineering and System Safety*, 137, 58-68, 2015.
- 1037 *IPCC: Managing the Risks of Extreme Events and Disasters to Advance Climate Change Adaptation. A*  
1038 *Special Report of Working Groups I and II of the Intergovernmental Panel on Climate Change*,  
1039 *edited by: Field, C. B., Barros, V., Stocker, T. F., Qin, D., Dokken, D. J., Ebi, K. L., Mastrandrea,*  
1040 *M. D., Mach, K. J., Plattner, G.-K., Allen, S. K., Tignor, M., and Midgley, P. M., Cambridge*  
1041 *University Press, Cambridge, UK, and New York, NY, USA, 582 pp., 2012.*
- 1042 Jaiswal, P. and van Westen, C. J.: *Use of quantitative landslide hazard and risk information for local*  
1043 *disaster risk reduction along a transportation corridor: a case study from Nilgiri district, India*, *Nat.*  
1044 *Hazards*, 65, 887-913, <https://doi.org/10.1007/s11069-012-0404-1>, 2013.
- 1045 Jaroszweski, D., and McNamara, T.: *The influence of rainfall on road accidents in urban areas: A weather*  
1046 *radar approach*, *Travel Behaviour and Society*, 1(1), 15-21, doi:10.1016/j.tbs.2013.10.005, 2014
- 1047 Kanonidi, H.K., Oraevskii, V.N., Belov, A.V., Gaidash, S.P., and Lobkov, V.L.: *Railway Automatic*  
1048 *System Failures under Geomagnetic Storms*, *Problems of Emergency Forecasting*, *Proceedings*,  
1049 *Moscow: Russian Ministry of Emergencies*, 41-42, 2002. (In Russian).
- 1050 Kaundinya, I., Nisancioglu, S., Kammerer, H., and Oliva, R.: *All-hazard guide for transport*  
1051 *infrastructure*, *Transportation Research Procedia*, 14, 1325-1334, 2016.
- 1052 Kellermann, P., Schoenberger, C., and Thielen, A. H.: *Large-scale application of the flood damage model*  
1053 *Railway Infrastructure Loss (RAIL)*, *Nat. Hazards Earth Syst. Sci.*, 16, 2357-2371, 2016.
- 1054 Kishcha, P.V., Ivanov-Cholodny, G.S., and Shelkovnikov, M.S.: *Zoning of air crashes*, *Physical Problems*  
1055 *of Ecology*, *Proceedings*, *Moscow*, 18-19, 1999.
- 1056 Ludvigsen, J. and Klæboe, R.: *Extreme weather impacts on freight railways in Europe*, *Nat. Hazards*, 70,  
1057 767-787, <https://doi.org/10.1007/s11069-013-0851-3>, 2014.
- 1058 *Malkhazova, S. M. and Chalov, R. S. (Eds.): Geography, Society and Environment. Vol. IV: Natural-*  
1059 *Anthropogenic Processes and Environmental Risk*, *Gorodets Publishing House, Moscow, Russia,*  
1060 *2004.*
- 1061 Mattsson, L. G., and Jenelius, E.: *Vulnerability and resilience of transport systems - a discussion of recent*  
1062 *research*, *Transportation Research A: Policy and Practice*, 81, 16-34, 2015.
- 1063 Miagkov, S.M.: *Geography of Natural Risk*, *Moscow: Moscow Univ. Press*, 1995. (In Russian).
- 1064 *Ministry of Transport of the Russian Federation: Transport Strategy of the Russian Federation for the*  
1065 *period until 2030, as amended on 12/05/2018, available at:*  
1066 <https://www.mintrans.ru/documents/3/1009>

- 1067 Neal, Ch., Girina, O., Senyukov, S., et al., Russian eruption warning systems for aviation, *Natural*  
1068 *Hazards*, Springer Netherlands, 51, 2, 245–262, 2009.
- 1069 Nogal, M., O'Connor, A., Caulfield, B., and Brazil, W.: A multidisciplinary approach for risk analysis of  
1070 infrastructure networks in response to extreme weather, *Transportation Research Procedia*, 14, 78–  
1071 85, 2016.
- 1072 Nyberg, R. and Johansson, M.: Indicators of road network vulnerability to storm-felled trees, *Nat.*  
1073 *Hazards*, 69, 185. <https://doi.org/10.1007/s11069-013-0693-z>, 2013.
- 1074 Petrova, E.: Critical infrastructure in Russia, *Geographical analysis of accidents triggered by natural*  
1075 *hazards*, *Env. Eng. and Management J.*, 10(1), 53–58, 2011.
- 1076 Petrova, E.: Natural hazards and technological risk in Russia: the relation assessment. *Nat. Hazards Earth*  
1077 *Syst. Sci.*, 5, 459–464, doi: 10.5194/nhess-5-459-2005, 2005.
- 1078 Petrova, E.: Road accidents in Russia: statistical and geographical analysis, *Scientific Annals of*  
1079 *"Alexandru Ioan Cuza" University of Iasi, Geography series*, 2013, 59(2), 111-123.
- 1080 Petrova, E.: Road and railway transport in Russia: safety and risks, *AES Bioflux*, 7(2), 259-271, 2015.
- 1081 Petrova, E. G., Shiryayeva, A. V.: Road accidents in Moscow: weather impact, *AES Bioflux*, 11(1), 19-30,  
1082 2019.
- 1083 Rakha, H., Farzaneh, M., Arafteh, M., Hranac, R., Sterzin, E. and Krechmer, D.: Empirical Studies on  
1084 Traffic Flow in Inclement Weather, Final Report – Phase I, 2007.
- 1085 Redelmeier, D. A., and Raza, Sh.: Life-threatening motor vehicle crashes in bright sunlight, *Medicine*,  
1086 96(1), e5710, 2017. doi: 10.1097/MD.0000000000005710
- 1087 Schlögl, M., Richter, G., Avian, M., Thaler, T., Heiss, G., Lenz, G., and Fuchs, S.: On the nexus between  
1088 landslide susceptibility and transport infrastructure – an agent-based approach, *Nat. Hazards Earth*  
1089 *Syst. Sci.*, 19, 201–219, <https://doi.org/10.5194/nhess-19-201-2019>, 2019.
- 1090 Satterthwaite, S. P.: An assessment of seasonal and weather effects on the frequency of road accidents in  
1091 California. *Accident Analysis & Prevention* 8(2), 87-96, 1976.
- 1092 Schneiderbauer, S. and Ehrlich, D.: Risk, hazard and people's vulnerability to natural hazards: A review  
1093 of definitions, concepts and data, *Eur. Comm. Jt. Res. Centre. EUR*, 21410, 40,  
1094 [https://doi.org/10.1007/978-3-540-75162-5\\_7](https://doi.org/10.1007/978-3-540-75162-5_7), 2004.
- 1095 Shabou, S., Ruin, I., Lutoff, C., Debionne, S., Anquetin, S., Creutin, J.-D., and Beaufils, X.: MObRISK: a  
1096 model for assessing the exposure of road users to flash flood events, *Nat. Hazards Earth Syst. Sci.*,  
1097 17, 1631–1651, <https://doi.org/10.5194/nhess-17-1631-2017>, 2017.
- 1098 Shiryayeva, A. V.: Meteorological Conditions for Functioning of Automobile Transport in Moscow and  
1099 Moscow Oblast, *Izvestia Russia Academy of Sci.*, 6, 94-101, 2016. (In Russian).
- 1100 Shnyarkov, A.L.: Methods of natural risk evaluation. Malkhazova, S. M. and Chalov, R. S. (Eds.):  
1101 *Geography, Society and Environment. Vol. IV: Natural-Anthropogenic Processes and*  
1102 *Environmental Risk*, Gorodets Publishing House, Moscow, Russia, 349-356, 2004.
- 1103 Spasova, Z. and Dimitrov, T.: The effects of precipitation on traffic accidents in Sofia, Bulgaria,  
1104 Asklepios, *International Annual for History and Philosophy of Medicine*, X (XXIX), 1, 76–81,  
1105 2015.

- 1106 Tanner, J. C.: Effect of Weather on Traffic Flow, *Nature*, 4290, 1952.
- 1107 Voumard, J., Derron, M.-H., and Jaboyedoff, M.: Natural hazard events affecting transportation networks  
1108 in Switzerland from 2012 to 2016, *Nat. Hazards Earth Syst. Sci.*, 18, 2093–2109,  
1109 <https://doi.org/10.5194/nhess-18-2093-2018>, 2018.
- 1110 WHO: The top 10 causes of death. Available from: <http://www.who.int/mediacentre/factsheets/fs310/en/>,  
1111 2017.
- 1112 Yakubovich, A., Trofimenko, Y., Pospelov P.: Principles of developing a procedure to assess  
1113 consequences of natural and climatic changes for transport infrastructure facilities in permafrost  
1114 regions, *Transportation Research Procedia* 36, 810–816, 2018.
- 1115 Yang, J., Sun, H., Wang, L., Li, L., and Wu, B.: Vulnerability Evaluation of the Highway Transportation  
1116 System against Meteorological Disasters, *Procedia - Social and Behavioral Sciences*, 96, 280 – 293,  
1117 2013.
- 1118
- 1119

1120 **Table 1: Transport accidents and traffic disruptions caused by natural hazards in Russia (1992-**  
 1121 **2018)**

1122

| Type of transport<br>Natural hazard   | Road<br>transport | Railway<br>transport | Air<br>transport | Water<br>transport |
|---------------------------------------|-------------------|----------------------|------------------|--------------------|
| Strong wind, storm                    |                   |                      | +                | +                  |
| Snowfall, snowstorm, snowdrift, sleet | +                 | +                    | +                | +                  |
| Rainfall, hailstone                   | +                 | +                    | +                |                    |
| Hard frost, icing, ice-crusted ground | +                 |                      | +                | +                  |
| Thunderstorm, lightning               |                   |                      | +                | +                  |
| Fog, mist                             | +                 |                      | +                | +                  |
| Flood                                 | +                 | +                    |                  |                    |
| Heat wave                             |                   | +                    |                  |                    |
| Earthquake, volcanic eruption         | +                 |                      | +                |                    |
| Landslide, slump, debris flow         | +                 | +                    |                  |                    |
| Rock fall                             | +                 | +                    |                  |                    |
| Snow avalanche                        | +                 | +                    | +                |                    |

1123

1124

# Natural hazard impacts on the transport infrastructure

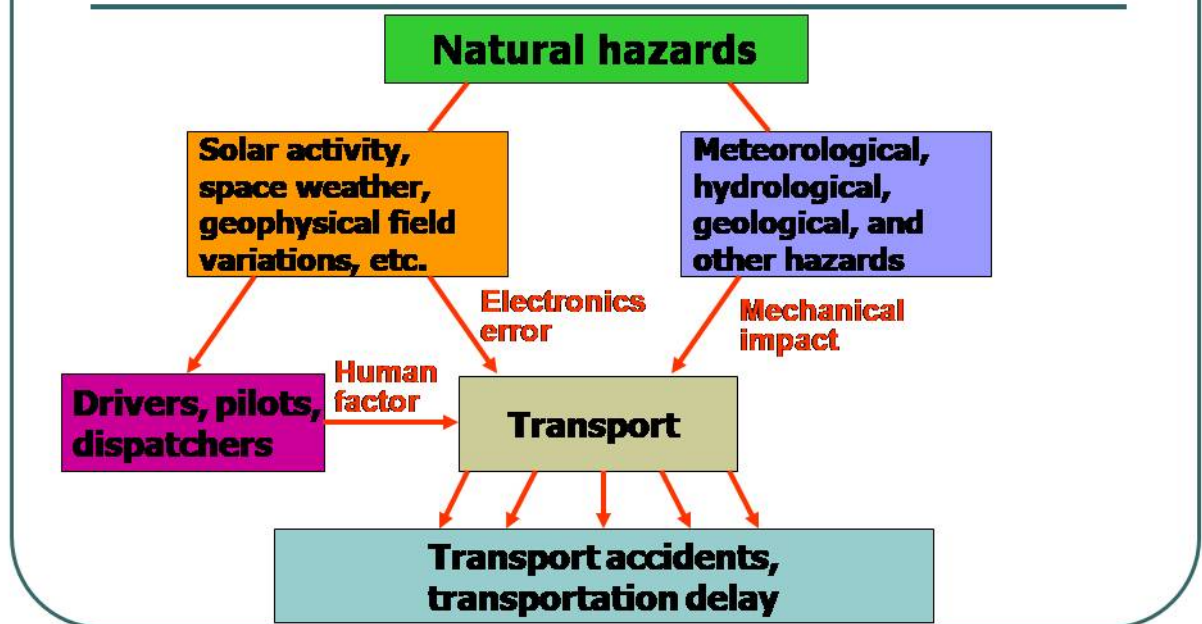

1125

1126

1127 Figure 1: Grouping of natural hazards based on their genesis and impacts on transport  
1128 infrastructure

1129

1130

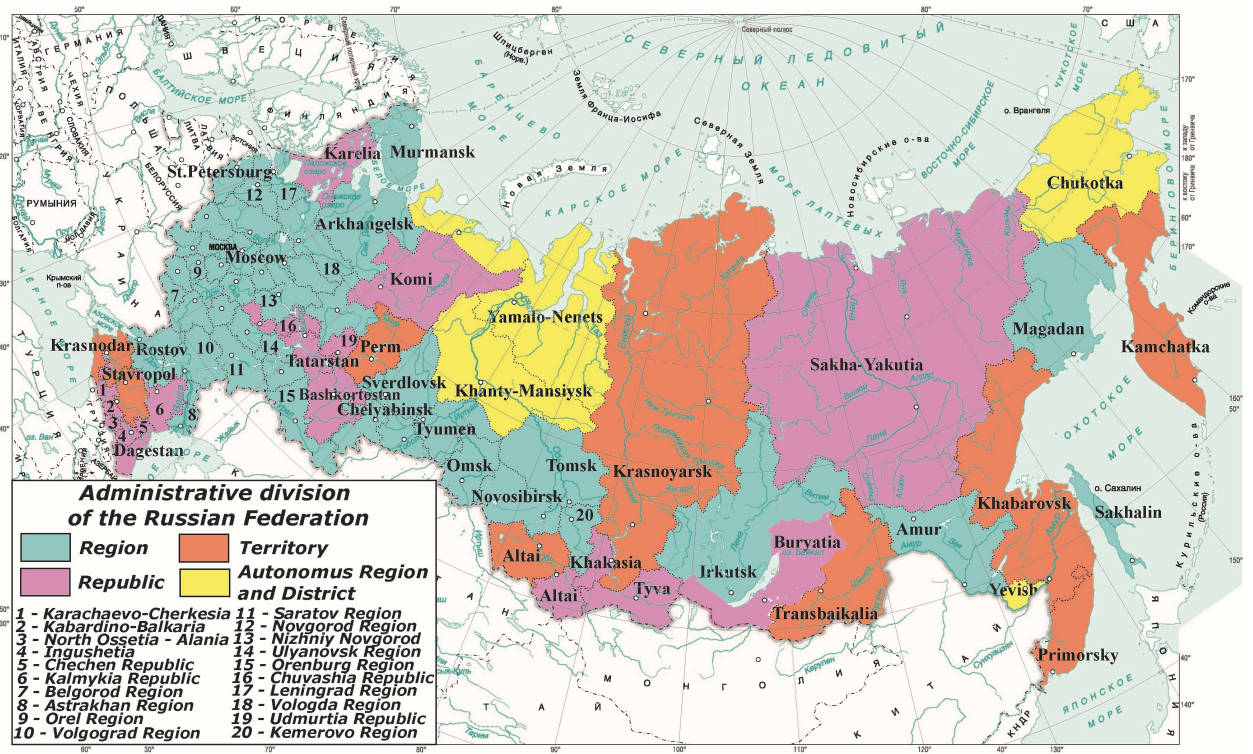

1131

1132

1133 **Figure 2: Federal regions of the Russian Federation**

1134 **(base map: © DIK - Publishing House Design. Information. Cartography)**

1135

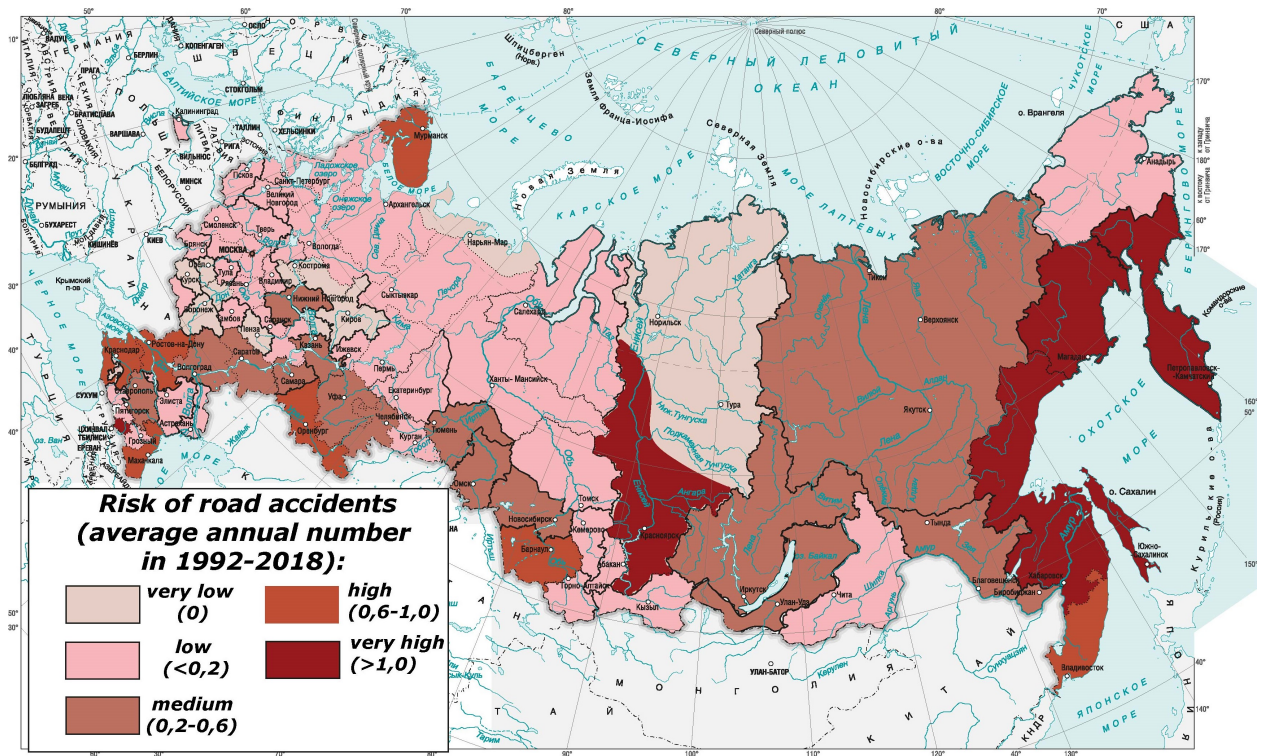

1136

1137

1138 **Figure 3: Risk of road accidents and traffic disruptions triggered by natural hazards in the RF**  
 1139 **(base map: © DIK - Publishing House Design. Information. Cartography)**

1140

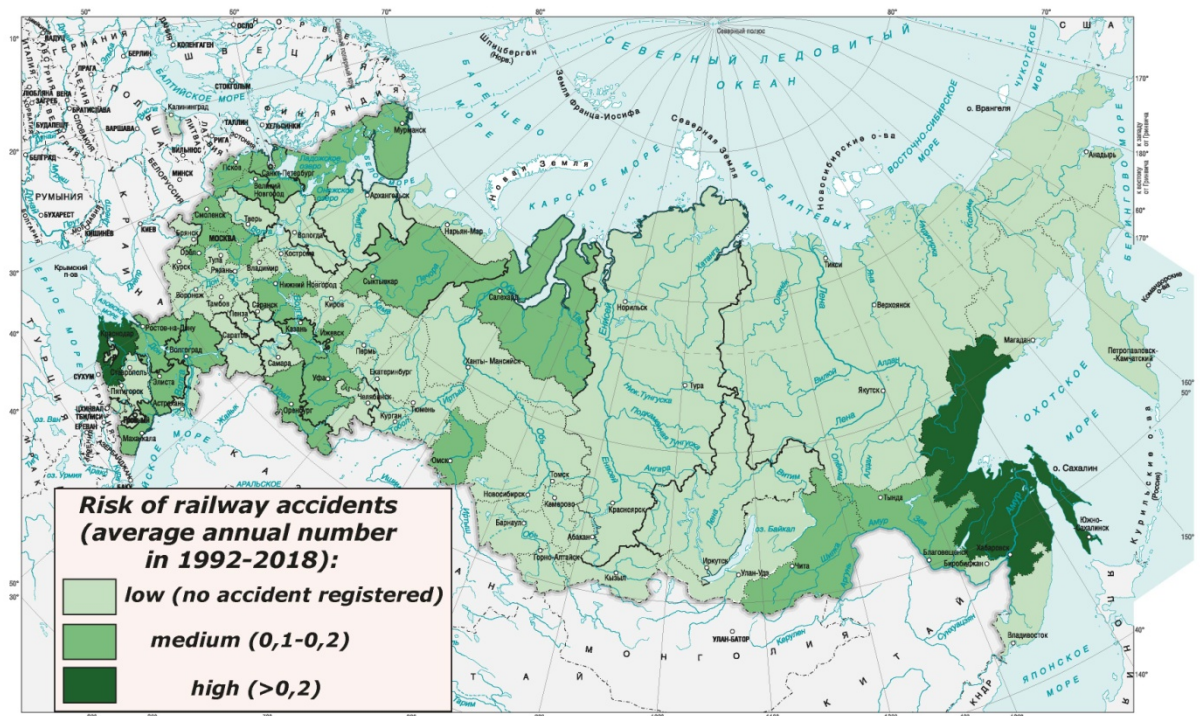

1141

1142

1143 **Figure 4: Risk of railway accidents and traffic disruptions triggered by natural hazards in the RF**  
 1144 **(base map: © DIK - Publishing House Design. Information. Cartography)**

1145



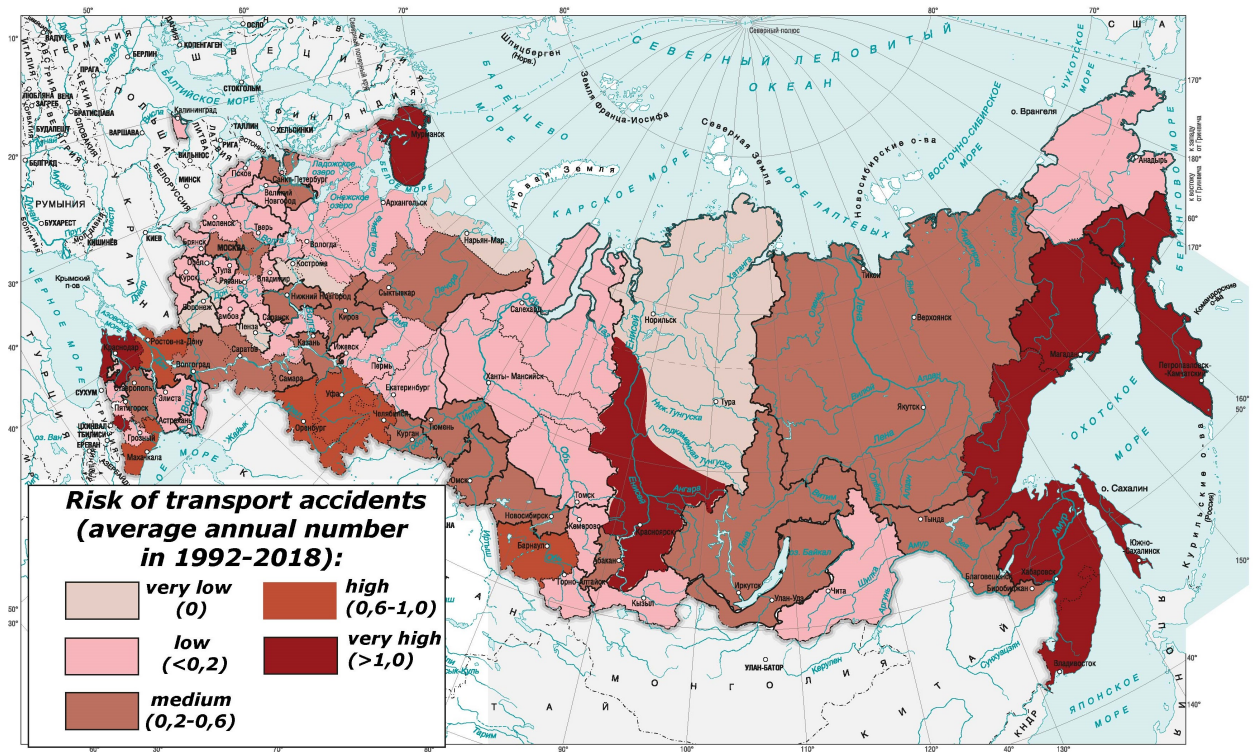

1146

1147

1148 **Figure 5:** Risk of transport accidents and disruptions triggered by natural hazards in the RF

1149 (base map: © DIK - Publishing House Design. Information. Cartography)

1150
